# Supplementary material for: Functional diversification gave rise to allelic specialization in a rice NLR immune receptor pair
Source: eLife. 2021 Nov 16;10:e71662. doi: 10.7554/eLife.71662 (PMC8631799; doi:10.7554/eLife.71662)
Supplement: Figure 2—figure supplement 3—source data 1. [file elife-71662-fig2-figsupp3-data1.csv]

treatment	Score	Replicate
Pikm-1/Pikm-2/AVR-PikD	3	1
Pikm-1/Pikm-2/AVR-PikD	4	1
Pikm-1/Pikm-2/AVR-PikD	4	1
Pikm-1/Pikm-2/AVR-PikD	3	1
Pikm-1/Pikm-2/AVR-PikD	4	1
Pikm-1/Pikm-2/AVR-PikD	4	1
Pikm-1/Pikm-2/AVR-PikD	2	1
Pikm-1/Pikm-2/AVR-PikD	5	1
Pikm-1/Pikm-2/AVR-PikD	2	1
Pikm-1/Pikm-2/AVR-PikD	5	1
Pikm-1/Pikm-2/AVR-PikD	6	2
Pikm-1/Pikm-2/AVR-PikD	6	2
Pikm-1/Pikm-2/AVR-PikD	6	2
Pikm-1/Pikm-2/AVR-PikD	6	2
Pikm-1/Pikm-2/AVR-PikD	5	2
Pikm-1/Pikm-2/AVR-PikD	6	2
Pikm-1/Pikm-2/AVR-PikD	5	2
Pikm-1/Pikm-2/AVR-PikD	6	2
Pikm-1/Pikm-2/AVR-PikD	5	2
Pikm-1/Pikm-2/AVR-PikD	5	2
Pikm-1/Pikm-2/AVR-PikD	6	3
Pikm-1/Pikm-2/AVR-PikD	4	3
Pikm-1/Pikm-2/AVR-PikD	3	3
Pikm-1/Pikm-2/AVR-PikD	5	3
Pikm-1/Pikm-2/AVR-PikD	6	3
Pikm-1/Pikm-2/AVR-PikD	4	3
Pikm-1/Pikm-2/AVR-PikD	6	3
Pikm-1/Pikm-2/AVR-PikD	5	3
Pikm-1/Pikm-2/AVR-PikD	5	3
Pikm-1/Pikm-2/AVR-PikD	5	3
Pikm-1/Pikm-2/AVR-PikE	1	1
Pikm-1/Pikm-2/AVR-PikE	3	1
Pikm-1/Pikm-2/AVR-PikE	4	1
Pikm-1/Pikm-2/AVR-PikE	3	1
Pikm-1/Pikm-2/AVR-PikE	1	1
Pikm-1/Pikm-2/AVR-PikE	2	1
Pikm-1/Pikm-2/AVR-PikE	1	1
Pikm-1/Pikm-2/AVR-PikE	3	1
Pikm-1/Pikm-2/AVR-PikE	0	1
Pikm-1/Pikm-2/AVR-PikE	3	1
Pikm-1/Pikm-2/AVR-PikE	6	2
Pikm-1/Pikm-2/AVR-PikE	4	2
Pikm-1/Pikm-2/AVR-PikE	4	2
Pikm-1/Pikm-2/AVR-PikE	4	2
Pikm-1/Pikm-2/AVR-PikE	5	2
Pikm-1/Pikm-2/AVR-PikE	5	2
Pikm-1/Pikm-2/AVR-PikE	4	2
Pikm-1/Pikm-2/AVR-PikE	4	2
Pikm-1/Pikm-2/AVR-PikE	3	2
Pikm-1/Pikm-2/AVR-PikE	4	2
Pikm-1/Pikm-2/AVR-PikE	4	3
Pikm-1/Pikm-2/AVR-PikE	2	3
Pikm-1/Pikm-2/AVR-PikE	1	3
Pikm-1/Pikm-2/AVR-PikE	4	3
Pikm-1/Pikm-2/AVR-PikE	3	3
Pikm-1/Pikm-2/AVR-PikE	3	3
Pikm-1/Pikm-2/AVR-PikE	2	3
Pikm-1/Pikm-2/AVR-PikE	2	3
Pikm-1/Pikm-2/AVR-PikE	1	3
Pikm-1/Pikm-2/AVR-PikE	2	3
Pikm-1/Pikm-2/AVR-PikA	1	1
Pikm-1/Pikm-2/AVR-PikA	1	1
Pikm-1/Pikm-2/AVR-PikA	1	1
Pikm-1/Pikm-2/AVR-PikA	2	1
Pikm-1/Pikm-2/AVR-PikA	1	1
Pikm-1/Pikm-2/AVR-PikA	0	1
Pikm-1/Pikm-2/AVR-PikA	0	1
Pikm-1/Pikm-2/AVR-PikA	1	1
Pikm-1/Pikm-2/AVR-PikA	0	1
Pikm-1/Pikm-2/AVR-PikA	0	1
Pikm-1/Pikm-2/AVR-PikA	4	2
Pikm-1/Pikm-2/AVR-PikA	4	2
Pikm-1/Pikm-2/AVR-PikA	4	2
Pikm-1/Pikm-2/AVR-PikA	3	2
Pikm-1/Pikm-2/AVR-PikA	5	2
Pikm-1/Pikm-2/AVR-PikA	3	2
Pikm-1/Pikm-2/AVR-PikA	3	2
Pikm-1/Pikm-2/AVR-PikA	4	2
Pikm-1/Pikm-2/AVR-PikA	3	2
Pikm-1/Pikm-2/AVR-PikA	3	2
Pikm-1/Pikm-2/AVR-PikA	1	3
Pikm-1/Pikm-2/AVR-PikA	0	3
Pikm-1/Pikm-2/AVR-PikA	0	3
Pikm-1/Pikm-2/AVR-PikA	1	3
Pikm-1/Pikm-2/AVR-PikA	2	3
Pikm-1/Pikm-2/AVR-PikA	2	3
Pikm-1/Pikm-2/AVR-PikA	1	3
Pikm-1/Pikm-2/AVR-PikA	1	3
Pikm-1/Pikm-2/AVR-PikA	2	3
Pikm-1/Pikm-2/AVR-PikA	1	3
Pikm-1/Pikm-2 (S434T)/AVR-PikD	3	1
Pikm-1/Pikm-2 (S434T)/AVR-PikD	5	1
Pikm-1/Pikm-2 (S434T)/AVR-PikD	4	1
Pikm-1/Pikm-2 (S434T)/AVR-PikD	3	1
Pikm-1/Pikm-2 (S434T)/AVR-PikD	4	1
Pikm-1/Pikm-2 (S434T)/AVR-PikD	4	1
Pikm-1/Pikm-2 (S434T)/AVR-PikD	2	1
Pikm-1/Pikm-2 (S434T)/AVR-PikD	5	1
Pikm-1/Pikm-2 (S434T)/AVR-PikD	2	1
Pikm-1/Pikm-2 (S434T)/AVR-PikD	3	1
Pikm-1/Pikm-2 (S434T)/AVR-PikD	6	2
Pikm-1/Pikm-2 (S434T)/AVR-PikD	6	2
Pikm-1/Pikm-2 (S434T)/AVR-PikD	6	2
Pikm-1/Pikm-2 (S434T)/AVR-PikD	6	2
Pikm-1/Pikm-2 (S434T)/AVR-PikD	5	2
Pikm-1/Pikm-2 (S434T)/AVR-PikD	6	2
Pikm-1/Pikm-2 (S434T)/AVR-PikD	5	2
Pikm-1/Pikm-2 (S434T)/AVR-PikD	6	2
Pikm-1/Pikm-2 (S434T)/AVR-PikD	5	2
Pikm-1/Pikm-2 (S434T)/AVR-PikD	6	2
Pikm-1/Pikm-2 (S434T)/AVR-PikD	6	3
Pikm-1/Pikm-2 (S434T)/AVR-PikD	6	3
Pikm-1/Pikm-2 (S434T)/AVR-PikD	3	3
Pikm-1/Pikm-2 (S434T)/AVR-PikD	5	3
Pikm-1/Pikm-2 (S434T)/AVR-PikD	6	3
Pikm-1/Pikm-2 (S434T)/AVR-PikD	4	3
Pikm-1/Pikm-2 (S434T)/AVR-PikD	6	3
Pikm-1/Pikm-2 (S434T)/AVR-PikD	6	3
Pikm-1/Pikm-2 (S434T)/AVR-PikD	6	3
Pikm-1/Pikm-2 (S434T)/AVR-PikD	6	3
Pikm-1/Pikm-2 (S434T)/AVR-PikE	1	1
Pikm-1/Pikm-2 (S434T)/AVR-PikE	3	1
Pikm-1/Pikm-2 (S434T)/AVR-PikE	3	1
Pikm-1/Pikm-2 (S434T)/AVR-PikE	3	1
Pikm-1/Pikm-2 (S434T)/AVR-PikE	2	1
Pikm-1/Pikm-2 (S434T)/AVR-PikE	2	1
Pikm-1/Pikm-2 (S434T)/AVR-PikE	1	1
Pikm-1/Pikm-2 (S434T)/AVR-PikE	3	1
Pikm-1/Pikm-2 (S434T)/AVR-PikE	0	1
Pikm-1/Pikm-2 (S434T)/AVR-PikE	3	1
Pikm-1/Pikm-2 (S434T)/AVR-PikE	6	2
Pikm-1/Pikm-2 (S434T)/AVR-PikE	4	2
Pikm-1/Pikm-2 (S434T)/AVR-PikE	4	2
Pikm-1/Pikm-2 (S434T)/AVR-PikE	4	2
Pikm-1/Pikm-2 (S434T)/AVR-PikE	5	2
Pikm-1/Pikm-2 (S434T)/AVR-PikE	5	2
Pikm-1/Pikm-2 (S434T)/AVR-PikE	4	2
Pikm-1/Pikm-2 (S434T)/AVR-PikE	4	2
Pikm-1/Pikm-2 (S434T)/AVR-PikE	3	2
Pikm-1/Pikm-2 (S434T)/AVR-PikE	5	2
Pikm-1/Pikm-2 (S434T)/AVR-PikE	5	3
Pikm-1/Pikm-2 (S434T)/AVR-PikE	5	3
Pikm-1/Pikm-2 (S434T)/AVR-PikE	2	3
Pikm-1/Pikm-2 (S434T)/AVR-PikE	4	3
Pikm-1/Pikm-2 (S434T)/AVR-PikE	4	3
Pikm-1/Pikm-2 (S434T)/AVR-PikE	3	3
Pikm-1/Pikm-2 (S434T)/AVR-PikE	3	3
Pikm-1/Pikm-2 (S434T)/AVR-PikE	3	3
Pikm-1/Pikm-2 (S434T)/AVR-PikE	2	3
Pikm-1/Pikm-2 (S434T)/AVR-PikE	3	3
Pikm-1/Pikm-2 (S434T)/AVR-PikA	1	1
Pikm-1/Pikm-2 (S434T)/AVR-PikA	2	1
Pikm-1/Pikm-2 (S434T)/AVR-PikA	1	1
Pikm-1/Pikm-2 (S434T)/AVR-PikA	2	1
Pikm-1/Pikm-2 (S434T)/AVR-PikA	2	1
Pikm-1/Pikm-2 (S434T)/AVR-PikA	0	1
Pikm-1/Pikm-2 (S434T)/AVR-PikA	0	1
Pikm-1/Pikm-2 (S434T)/AVR-PikA	2	1
Pikm-1/Pikm-2 (S434T)/AVR-PikA	0	1
Pikm-1/Pikm-2 (S434T)/AVR-PikA	3	1
Pikm-1/Pikm-2 (S434T)/AVR-PikA	3	2
Pikm-1/Pikm-2 (S434T)/AVR-PikA	4	2
Pikm-1/Pikm-2 (S434T)/AVR-PikA	4	2
Pikm-1/Pikm-2 (S434T)/AVR-PikA	3	2
Pikm-1/Pikm-2 (S434T)/AVR-PikA	6	2
Pikm-1/Pikm-2 (S434T)/AVR-PikA	3	2
Pikm-1/Pikm-2 (S434T)/AVR-PikA	3	2
Pikm-1/Pikm-2 (S434T)/AVR-PikA	4	2
Pikm-1/Pikm-2 (S434T)/AVR-PikA	3	2
Pikm-1/Pikm-2 (S434T)/AVR-PikA	3	2
Pikm-1/Pikm-2 (S434T)/AVR-PikA	2	3
Pikm-1/Pikm-2 (S434T)/AVR-PikA	2	3
Pikm-1/Pikm-2 (S434T)/AVR-PikA	2	3
Pikm-1/Pikm-2 (S434T)/AVR-PikA	1	3
Pikm-1/Pikm-2 (S434T)/AVR-PikA	4	3
Pikm-1/Pikm-2 (S434T)/AVR-PikA	1	3
Pikm-1/Pikm-2 (S434T)/AVR-PikA	3	3
Pikm-1/Pikm-2 (S434T)/AVR-PikA	2	3
Pikm-1/Pikm-2 (S434T)/AVR-PikA	2	3
Pikm-1/Pikm-2 (S434T)/AVR-PikA	2	3
