# Supplementary material for: Functional diversification gave rise to allelic specialization in a rice NLR immune receptor pair
Source: eLife. 2021 Nov 16;10:e71662. doi: 10.7554/eLife.71662 (PMC8631799; doi:10.7554/eLife.71662)
Supplement: Figure 2—figure supplement 3—source data 2. [file elife-71662-fig2-figsupp3-data2.csv]

treatment	Effector	NLR1	Score	Replicate
Pikm-1/Pikm-2/AVR-PikD	1	Pikm	3	1
Pikm-1/Pikm-2/AVR-PikD	1	Pikm	6	1
Pikm-1/Pikm-2/AVR-PikD	1	Pikm	4	1
Pikm-1/Pikm-2/AVR-PikD	1	Pikm	4	1
Pikm-1/Pikm-2/AVR-PikD	1	Pikm	4	1
Pikm-1/Pikm-2/AVR-PikD	1	Pikm	1	1
Pikm-1/Pikm-2/AVR-PikD	1	Pikm	3	1
Pikm-1/Pikm-2/AVR-PikD	1	Pikm	5	1
Pikm-1/Pikm-2/AVR-PikD	1	Pikm	3	1
Pikm-1/Pikm-2/AVR-PikD	1	Pikm	5	1
Pikm-1/Pikm-2/AVR-PikD	1	Pikm	4	2
Pikm-1/Pikm-2/AVR-PikD	1	Pikm	5	2
Pikm-1/Pikm-2/AVR-PikD	1	Pikm	6	2
Pikm-1/Pikm-2/AVR-PikD	1	Pikm	6	2
Pikm-1/Pikm-2/AVR-PikD	1	Pikm	5	2
Pikm-1/Pikm-2/AVR-PikD	1	Pikm	6	2
Pikm-1/Pikm-2/AVR-PikD	1	Pikm	6	2
Pikm-1/Pikm-2/AVR-PikD	1	Pikm	4	2
Pikm-1/Pikm-2/AVR-PikD	1	Pikm	5	2
Pikm-1/Pikm-2/AVR-PikD	1	Pikm	5	2
Pikm-1/Pikm-2/AVR-PikD	1	Pikm	6	3
Pikm-1/Pikm-2/AVR-PikD	1	Pikm	4	3
Pikm-1/Pikm-2/AVR-PikD	1	Pikm	3	3
Pikm-1/Pikm-2/AVR-PikD	1	Pikm	6	3
Pikm-1/Pikm-2/AVR-PikD	1	Pikm	4	3
Pikm-1/Pikm-2/AVR-PikD	1	Pikm	3	3
Pikm-1/Pikm-2/AVR-PikD	1	Pikm	6	3
Pikm-1/Pikm-2/AVR-PikD	1	Pikm	4	3
Pikm-1/Pikm-2/AVR-PikD	1	Pikm	5	3
Pikm-1/Pikm-2/AVR-PikE	2	Pikm	1	1
Pikm-1/Pikm-2/AVR-PikE	2	Pikm	3	1
Pikm-1/Pikm-2/AVR-PikE	2	Pikm	3	1
Pikm-1/Pikm-2/AVR-PikE	2	Pikm	4	1
Pikm-1/Pikm-2/AVR-PikE	2	Pikm	3	1
Pikm-1/Pikm-2/AVR-PikE	2	Pikm	1	1
Pikm-1/Pikm-2/AVR-PikE	2	Pikm	0	1
Pikm-1/Pikm-2/AVR-PikE	2	Pikm	3	1
Pikm-1/Pikm-2/AVR-PikE	2	Pikm	1	1
Pikm-1/Pikm-2/AVR-PikE	2	Pikm	3	1
Pikm-1/Pikm-2/AVR-PikE	2	Pikm	3	2
Pikm-1/Pikm-2/AVR-PikE	2	Pikm	3	2
Pikm-1/Pikm-2/AVR-PikE	2	Pikm	3	2
Pikm-1/Pikm-2/AVR-PikE	2	Pikm	5	2
Pikm-1/Pikm-2/AVR-PikE	2	Pikm	4	2
Pikm-1/Pikm-2/AVR-PikE	2	Pikm	5	2
Pikm-1/Pikm-2/AVR-PikE	2	Pikm	4	2
Pikm-1/Pikm-2/AVR-PikE	2	Pikm	3	2
Pikm-1/Pikm-2/AVR-PikE	2	Pikm	4	2
Pikm-1/Pikm-2/AVR-PikE	2	Pikm	4	2
Pikm-1/Pikm-2/AVR-PikE	2	Pikm	5	3
Pikm-1/Pikm-2/AVR-PikE	2	Pikm	3	3
Pikm-1/Pikm-2/AVR-PikE	2	Pikm	2	3
Pikm-1/Pikm-2/AVR-PikE	2	Pikm	4	3
Pikm-1/Pikm-2/AVR-PikE	2	Pikm	3	3
Pikm-1/Pikm-2/AVR-PikE	2	Pikm	2	3
Pikm-1/Pikm-2/AVR-PikE	2	Pikm	5	3
Pikm-1/Pikm-2/AVR-PikE	2	Pikm	2	3
Pikm-1/Pikm-2/AVR-PikE	2	Pikm	2	3
Pikm-1/Pikm-2/AVR-PikA	3	Pikm	2	1
Pikm-1/Pikm-2/AVR-PikA	3	Pikm	4	1
Pikm-1/Pikm-2/AVR-PikA	3	Pikm	3	1
Pikm-1/Pikm-2/AVR-PikA	3	Pikm	3	1
Pikm-1/Pikm-2/AVR-PikA	3	Pikm	1	1
Pikm-1/Pikm-2/AVR-PikA	3	Pikm	1	1
Pikm-1/Pikm-2/AVR-PikA	3	Pikm	0	1
Pikm-1/Pikm-2/AVR-PikA	3	Pikm	2	1
Pikm-1/Pikm-2/AVR-PikA	3	Pikm	1	1
Pikm-1/Pikm-2/AVR-PikA	3	Pikm	2	1
Pikm-1/Pikm-2/AVR-PikA	3	Pikm	5	2
Pikm-1/Pikm-2/AVR-PikA	3	Pikm	3	2
Pikm-1/Pikm-2/AVR-PikA	3	Pikm	2	2
Pikm-1/Pikm-2/AVR-PikA	3	Pikm	4	2
Pikm-1/Pikm-2/AVR-PikA	3	Pikm	3	2
Pikm-1/Pikm-2/AVR-PikA	3	Pikm	4	2
Pikm-1/Pikm-2/AVR-PikA	3	Pikm	4	2
Pikm-1/Pikm-2/AVR-PikA	3	Pikm	3	2
Pikm-1/Pikm-2/AVR-PikA	3	Pikm	3	2
Pikm-1/Pikm-2/AVR-PikA	3	Pikm	2	2
Pikm-1/Pikm-2/AVR-PikA	3	Pikm	2	3
Pikm-1/Pikm-2/AVR-PikA	3	Pikm	1	3
Pikm-1/Pikm-2/AVR-PikA	3	Pikm	0	3
Pikm-1/Pikm-2/AVR-PikA	3	Pikm	5	3
Pikm-1/Pikm-2/AVR-PikA	3	Pikm	1	3
Pikm-1/Pikm-2/AVR-PikA	3	Pikm	1	3
Pikm-1/Pikm-2/AVR-PikA	3	Pikm	1	3
Pikm-1/Pikm-2/AVR-PikA	3	Pikm	0	3
Pikm-1/Pikm-2/AVR-PikA	3	Pikm	1	3
Pikm-1/Pikm-2 (V627M)/AVR-PikD	1	Pikp	5	1
Pikm-1/Pikm-2 (V627M)/AVR-PikD	1	Pikp	6	1
Pikm-1/Pikm-2 (V627M)/AVR-PikD	1	Pikp	6	1
Pikm-1/Pikm-2 (V627M)/AVR-PikD	1	Pikp	4	1
Pikm-1/Pikm-2 (V627M)/AVR-PikD	1	Pikp	5	1
Pikm-1/Pikm-2 (V627M)/AVR-PikD	1	Pikp	4	1
Pikm-1/Pikm-2 (V627M)/AVR-PikD	1	Pikp	4	1
Pikm-1/Pikm-2 (V627M)/AVR-PikD	1	Pikp	6	1
Pikm-1/Pikm-2 (V627M)/AVR-PikD	1	Pikp	4	1
Pikm-1/Pikm-2 (V627M)/AVR-PikD	1	Pikp	5	1
Pikm-1/Pikm-2 (V627M)/AVR-PikD	1	Pikp	6	2
Pikm-1/Pikm-2 (V627M)/AVR-PikD	1	Pikp	6	2
Pikm-1/Pikm-2 (V627M)/AVR-PikD	1	Pikp	6	2
Pikm-1/Pikm-2 (V627M)/AVR-PikD	1	Pikp	6	2
Pikm-1/Pikm-2 (V627M)/AVR-PikD	1	Pikp	6	2
Pikm-1/Pikm-2 (V627M)/AVR-PikD	1	Pikp	6	2
Pikm-1/Pikm-2 (V627M)/AVR-PikD	1	Pikp	6	2
Pikm-1/Pikm-2 (V627M)/AVR-PikD	1	Pikp	4	2
Pikm-1/Pikm-2 (V627M)/AVR-PikD	1	Pikp	6	2
Pikm-1/Pikm-2 (V627M)/AVR-PikD	1	Pikp	6	2
Pikm-1/Pikm-2 (V627M)/AVR-PikD	1	Pikp	6	3
Pikm-1/Pikm-2 (V627M)/AVR-PikD	1	Pikp	4	3
Pikm-1/Pikm-2 (V627M)/AVR-PikD	1	Pikp	5	3
Pikm-1/Pikm-2 (V627M)/AVR-PikD	1	Pikp	6	3
Pikm-1/Pikm-2 (V627M)/AVR-PikD	1	Pikp	6	3
Pikm-1/Pikm-2 (V627M)/AVR-PikD	1	Pikp	6	3
Pikm-1/Pikm-2 (V627M)/AVR-PikD	1	Pikp	6	3
Pikm-1/Pikm-2 (V627M)/AVR-PikD	1	Pikp	5	3
Pikm-1/Pikm-2 (V627M)/AVR-PikD	1	Pikp	6	3
Pikm-1/Pikm-2 (V627M)/AVR-PikE	2	Pikp	2	1
Pikm-1/Pikm-2 (V627M)/AVR-PikE	2	Pikp	4	1
Pikm-1/Pikm-2 (V627M)/AVR-PikE	2	Pikp	6	1
Pikm-1/Pikm-2 (V627M)/AVR-PikE	2	Pikp	5	1
Pikm-1/Pikm-2 (V627M)/AVR-PikE	2	Pikp	4	1
Pikm-1/Pikm-2 (V627M)/AVR-PikE	2	Pikp	3	1
Pikm-1/Pikm-2 (V627M)/AVR-PikE	2	Pikp	3	1
Pikm-1/Pikm-2 (V627M)/AVR-PikE	2	Pikp	5	1
Pikm-1/Pikm-2 (V627M)/AVR-PikE	2	Pikp	2	1
Pikm-1/Pikm-2 (V627M)/AVR-PikE	2	Pikp	4	1
Pikm-1/Pikm-2 (V627M)/AVR-PikE	2	Pikp	4	2
Pikm-1/Pikm-2 (V627M)/AVR-PikE	2	Pikp	6	2
Pikm-1/Pikm-2 (V627M)/AVR-PikE	2	Pikp	6	2
Pikm-1/Pikm-2 (V627M)/AVR-PikE	2	Pikp	6	2
Pikm-1/Pikm-2 (V627M)/AVR-PikE	2	Pikp	6	2
Pikm-1/Pikm-2 (V627M)/AVR-PikE	2	Pikp	6	2
Pikm-1/Pikm-2 (V627M)/AVR-PikE	2	Pikp	5	2
Pikm-1/Pikm-2 (V627M)/AVR-PikE	2	Pikp	4	2
Pikm-1/Pikm-2 (V627M)/AVR-PikE	2	Pikp	6	2
Pikm-1/Pikm-2 (V627M)/AVR-PikE	2	Pikp	5	2
Pikm-1/Pikm-2 (V627M)/AVR-PikE	2	Pikp	6	3
Pikm-1/Pikm-2 (V627M)/AVR-PikE	2	Pikp	3	3
Pikm-1/Pikm-2 (V627M)/AVR-PikE	2	Pikp	4	3
Pikm-1/Pikm-2 (V627M)/AVR-PikE	2	Pikp	5	3
Pikm-1/Pikm-2 (V627M)/AVR-PikE	2	Pikp	6	3
Pikm-1/Pikm-2 (V627M)/AVR-PikE	2	Pikp	6	3
Pikm-1/Pikm-2 (V627M)/AVR-PikE	2	Pikp	6	3
Pikm-1/Pikm-2 (V627M)/AVR-PikE	2	Pikp	4	3
Pikm-1/Pikm-2 (V627M)/AVR-PikE	2	Pikp	3	3
Pikm-1/Pikm-2 (V627M)/AVR-PikA	3	Pikp	2	1
Pikm-1/Pikm-2 (V627M)/AVR-PikA	3	Pikp	5	1
Pikm-1/Pikm-2 (V627M)/AVR-PikA	3	Pikp	6	1
Pikm-1/Pikm-2 (V627M)/AVR-PikA	3	Pikp	4	1
Pikm-1/Pikm-2 (V627M)/AVR-PikA	3	Pikp	4	1
Pikm-1/Pikm-2 (V627M)/AVR-PikA	3	Pikp	3	1
Pikm-1/Pikm-2 (V627M)/AVR-PikA	3	Pikp	2	1
Pikm-1/Pikm-2 (V627M)/AVR-PikA	3	Pikp	4	1
Pikm-1/Pikm-2 (V627M)/AVR-PikA	3	Pikp	2	1
Pikm-1/Pikm-2 (V627M)/AVR-PikA	3	Pikp	3	1
Pikm-1/Pikm-2 (V627M)/AVR-PikA	3	Pikp	6	2
Pikm-1/Pikm-2 (V627M)/AVR-PikA	3	Pikp	5	2
Pikm-1/Pikm-2 (V627M)/AVR-PikA	3	Pikp	6	2
Pikm-1/Pikm-2 (V627M)/AVR-PikA	3	Pikp	6	2
Pikm-1/Pikm-2 (V627M)/AVR-PikA	3	Pikp	6	2
Pikm-1/Pikm-2 (V627M)/AVR-PikA	3	Pikp	6	2
Pikm-1/Pikm-2 (V627M)/AVR-PikA	3	Pikp	5	2
Pikm-1/Pikm-2 (V627M)/AVR-PikA	3	Pikp	4	2
Pikm-1/Pikm-2 (V627M)/AVR-PikA	3	Pikp	6	2
Pikm-1/Pikm-2 (V627M)/AVR-PikA	3	Pikp	5	2
Pikm-1/Pikm-2 (V627M)/AVR-PikA	3	Pikp	5	3
Pikm-1/Pikm-2 (V627M)/AVR-PikA	3	Pikp	2	3
Pikm-1/Pikm-2 (V627M)/AVR-PikA	3	Pikp	2	3
Pikm-1/Pikm-2 (V627M)/AVR-PikA	3	Pikp	5	3
Pikm-1/Pikm-2 (V627M)/AVR-PikA	3	Pikp	4	3
Pikm-1/Pikm-2 (V627M)/AVR-PikA	3	Pikp	4	3
Pikm-1/Pikm-2 (V627M)/AVR-PikA	3	Pikp	5	3
Pikm-1/Pikm-2 (V627M)/AVR-PikA	3	Pikp	3	3
Pikm-1/Pikm-2 (V627M)/AVR-PikA	3	Pikp	3	3
