# Supplementary material for: Functional diversification gave rise to allelic specialization in a rice NLR immune receptor pair
Source: eLife. 2021 Nov 16;10:e71662. doi: 10.7554/eLife.71662 (PMC8631799; doi:10.7554/eLife.71662)
Supplement: Figure 5—figure supplement 2—source data 1. [file elife-71662-fig5-figsupp2-data1.csv]

treatment	Score	Replicate
Pikp-1/Pikp-2 (D230E)/mCherry	4	1
Pikp-1/Pikp-2 (D230E)/mCherry	5	1
Pikp-1/Pikp-2 (D230E)/mCherry	5	1
Pikp-1/Pikp-2 (D230E)/mCherry	6	1
Pikp-1/Pikp-2 (D230E)/mCherry	6	1
Pikp-1/Pikp-2 (D230E)/mCherry	6	1
Pikp-1/Pikp-2 (D230E)/mCherry	6	1
Pikp-1/Pikp-2 (D230E)/mCherry	6	1
Pikp-1/Pikp-2 (D230E)/mCherry	6	1
Pikp-1/Pikp-2 (D230E)/mCherry	6	1
Pikp-1/Pikp-2 (D230E)/mCherry	6	1
Pikp-1/Pikp-2 (D230E)/mCherry	6	1
Pikp-1/Pikp-2 (D230E)/mCherry	6	1
Pikp-1/Pikp-2 (D230E)/mCherry	6	1
Pikp-1/Pikp-2 (D230E)/mCherry	6	1
Pikp-1/Pikp-2 (D230E)/mCherry	6	1
Pikp-1/Pikp-2 (D230E)/mCherry	6	1
Pikp-1/Pikp-2 (D230E)/mCherry	6	1
Pikp-1/Pikp-2 (D230E)/mCherry	6	1
Pikp-1/Pikp-2 (D230E)/mCherry	6	1
Pikp-1/Pikp-2 (D230E)/mCherry	5	2
Pikp-1/Pikp-2 (D230E)/mCherry	6	2
Pikp-1/Pikp-2 (D230E)/mCherry	6	2
Pikp-1/Pikp-2 (D230E)/mCherry	6	2
Pikp-1/Pikp-2 (D230E)/mCherry	6	2
Pikp-1/Pikp-2 (D230E)/mCherry	6	2
Pikp-1/Pikp-2 (D230E)/mCherry	6	2
Pikp-1/Pikp-2 (D230E)/mCherry	6	2
Pikp-1/Pikp-2 (D230E)/mCherry	6	2
Pikp-1/Pikp-2 (D230E)/mCherry	6	2
Pikp-1/Pikp-2 (D230E)/mCherry	6	2
Pikp-1/Pikp-2 (D230E)/mCherry	6	2
Pikp-1/Pikp-2 (D230E)/mCherry	6	2
Pikp-1/Pikp-2 (D230E)/mCherry	6	2
Pikp-1/Pikp-2 (D230E)/mCherry	6	2
Pikp-1/Pikp-2 (D230E)/mCherry	6	2
Pikp-1/Pikp-2 (D230E)/mCherry	6	2
Pikp-1/Pikp-2 (D230E)/mCherry	6	2
Pikp-1/Pikp-2 (D230E)/mCherry	6	2
Pikp-1/Pikp-2 (D230E)/mCherry	6	2
Pikp-1/Pikp-2 (D230E)/mCherry	6	3
Pikp-1/Pikp-2 (D230E)/mCherry	6	3
Pikp-1/Pikp-2 (D230E)/mCherry	6	3
Pikp-1/Pikp-2 (D230E)/mCherry	6	3
Pikp-1/Pikp-2 (D230E)/mCherry	6	3
Pikp-1/Pikp-2 (D230E)/mCherry	6	3
Pikp-1/Pikp-2 (D230E)/mCherry	6	3
Pikp-1/Pikp-2 (D230E)/mCherry	6	3
Pikp-1/Pikp-2 (D230E)/mCherry	6	3
Pikp-1/Pikp-2 (D230E)/mCherry	6	3
Pikp-1/Pikp-2 (D230E)/mCherry	6	3
Pikp-1/Pikp-2 (D230E)/mCherry	6	3
Pikp-1/Pikp-2 (D230E)/mCherry	6	3
Pikp-1/Pikp-2 (D230E)/mCherry	6	3
Pikp-1/Pikp-2 (D230E)/mCherry	6	3
Pikp-1/Pikp-2 (D230E)/mCherry	6	3
Pikp-1/Pikp-2 (D230E)/mCherry	6	3
Pikp-1/Pikp-2 (D230E)/mCherry	6	3
Pikp-1/Pikp-2 (D230E)/mCherry	6	3
Pikp-1/Pikp-2 (D230E)/mCherry	6	3
Pikp-1/Pikp-2 (D230E K217R)/mCherry	0	1
Pikp-1/Pikp-2 (D230E K217R)/mCherry	0	1
Pikp-1/Pikp-2 (D230E K217R)/mCherry	0	1
Pikp-1/Pikp-2 (D230E K217R)/mCherry	0	1
Pikp-1/Pikp-2 (D230E K217R)/mCherry	0	1
Pikp-1/Pikp-2 (D230E K217R)/mCherry	0	1
Pikp-1/Pikp-2 (D230E K217R)/mCherry	0	1
Pikp-1/Pikp-2 (D230E K217R)/mCherry	0	1
Pikp-1/Pikp-2 (D230E K217R)/mCherry	0	1
Pikp-1/Pikp-2 (D230E K217R)/mCherry	0	1
Pikp-1/Pikp-2 (D230E K217R)/mCherry	0	1
Pikp-1/Pikp-2 (D230E K217R)/mCherry	0	1
Pikp-1/Pikp-2 (D230E K217R)/mCherry	0	1
Pikp-1/Pikp-2 (D230E K217R)/mCherry	0	1
Pikp-1/Pikp-2 (D230E K217R)/mCherry	0	1
Pikp-1/Pikp-2 (D230E K217R)/mCherry	0	1
Pikp-1/Pikp-2 (D230E K217R)/mCherry	0	1
Pikp-1/Pikp-2 (D230E K217R)/mCherry	0	1
Pikp-1/Pikp-2 (D230E K217R)/mCherry	0	1
Pikp-1/Pikp-2 (D230E K217R)/mCherry	0	1
Pikp-1/Pikp-2 (D230E K217R)/mCherry	0	2
Pikp-1/Pikp-2 (D230E K217R)/mCherry	0	2
Pikp-1/Pikp-2 (D230E K217R)/mCherry	0	2
Pikp-1/Pikp-2 (D230E K217R)/mCherry	0	2
Pikp-1/Pikp-2 (D230E K217R)/mCherry	0	2
Pikp-1/Pikp-2 (D230E K217R)/mCherry	0	2
Pikp-1/Pikp-2 (D230E K217R)/mCherry	0	2
Pikp-1/Pikp-2 (D230E K217R)/mCherry	0	2
Pikp-1/Pikp-2 (D230E K217R)/mCherry	0	2
Pikp-1/Pikp-2 (D230E K217R)/mCherry	0	2
Pikp-1/Pikp-2 (D230E K217R)/mCherry	0	2
Pikp-1/Pikp-2 (D230E K217R)/mCherry	0	2
Pikp-1/Pikp-2 (D230E K217R)/mCherry	0	2
Pikp-1/Pikp-2 (D230E K217R)/mCherry	0	2
Pikp-1/Pikp-2 (D230E K217R)/mCherry	0	2
Pikp-1/Pikp-2 (D230E K217R)/mCherry	0	2
Pikp-1/Pikp-2 (D230E K217R)/mCherry	0	2
Pikp-1/Pikp-2 (D230E K217R)/mCherry	0	2
Pikp-1/Pikp-2 (D230E K217R)/mCherry	0	2
Pikp-1/Pikp-2 (D230E K217R)/mCherry	0	2
Pikp-1/Pikp-2 (D230E K217R)/mCherry	0	3
Pikp-1/Pikp-2 (D230E K217R)/mCherry	0	3
Pikp-1/Pikp-2 (D230E K217R)/mCherry	0	3
Pikp-1/Pikp-2 (D230E K217R)/mCherry	0	3
Pikp-1/Pikp-2 (D230E K217R)/mCherry	0	3
Pikp-1/Pikp-2 (D230E K217R)/mCherry	0	3
Pikp-1/Pikp-2 (D230E K217R)/mCherry	0	3
Pikp-1/Pikp-2 (D230E K217R)/mCherry	0	3
Pikp-1/Pikp-2 (D230E K217R)/mCherry	0	3
Pikp-1/Pikp-2 (D230E K217R)/mCherry	0	3
Pikp-1/Pikp-2 (D230E K217R)/mCherry	0	3
Pikp-1/Pikp-2 (D230E K217R)/mCherry	0	3
Pikp-1/Pikp-2 (D230E K217R)/mCherry	0	3
Pikp-1/Pikp-2 (D230E K217R)/mCherry	0	3
Pikp-1/Pikp-2 (D230E K217R)/mCherry	0	3
Pikp-1/Pikp-2 (D230E K217R)/mCherry	0	3
Pikp-1/Pikp-2 (D230E K217R)/mCherry	0	3
Pikp-1/Pikp-2 (D230E K217R)/mCherry	0	3
Pikp-1/Pikp-2 (D230E K217R)/mCherry	0	3
Pikp-1/Pikp-2 (D230E K217R)/mCherry	0	3
Pikp-1/Pikp-2 (D230E)/AVR-PikD	6	1
Pikp-1/Pikp-2 (D230E)/AVR-PikD	6	1
Pikp-1/Pikp-2 (D230E)/AVR-PikD	6	1
Pikp-1/Pikp-2 (D230E)/AVR-PikD	6	1
Pikp-1/Pikp-2 (D230E)/AVR-PikD	6	1
Pikp-1/Pikp-2 (D230E)/AVR-PikD	6	1
Pikp-1/Pikp-2 (D230E)/AVR-PikD	6	1
Pikp-1/Pikp-2 (D230E)/AVR-PikD	6	1
Pikp-1/Pikp-2 (D230E)/AVR-PikD	6	1
Pikp-1/Pikp-2 (D230E)/AVR-PikD	6	1
Pikp-1/Pikp-2 (D230E)/AVR-PikD	6	2
Pikp-1/Pikp-2 (D230E)/AVR-PikD	6	2
Pikp-1/Pikp-2 (D230E)/AVR-PikD	6	2
Pikp-1/Pikp-2 (D230E)/AVR-PikD	6	2
Pikp-1/Pikp-2 (D230E)/AVR-PikD	6	2
Pikp-1/Pikp-2 (D230E)/AVR-PikD	6	2
Pikp-1/Pikp-2 (D230E)/AVR-PikD	6	2
Pikp-1/Pikp-2 (D230E)/AVR-PikD	6	2
Pikp-1/Pikp-2 (D230E)/AVR-PikD	6	2
Pikp-1/Pikp-2 (D230E)/AVR-PikD	6	2
Pikp-1/Pikp-2 (D230E)/AVR-PikD	6	3
Pikp-1/Pikp-2 (D230E)/AVR-PikD	6	3
Pikp-1/Pikp-2 (D230E)/AVR-PikD	6	3
Pikp-1/Pikp-2 (D230E)/AVR-PikD	6	3
Pikp-1/Pikp-2 (D230E)/AVR-PikD	6	3
Pikp-1/Pikp-2 (D230E)/AVR-PikD	6	3
Pikp-1/Pikp-2 (D230E)/AVR-PikD	6	3
Pikp-1/Pikp-2 (D230E)/AVR-PikD	6	3
Pikp-1/Pikp-2 (D230E)/AVR-PikD	6	3
Pikp-1/Pikp-2 (D230E)/AVR-PikD	6	3
Pikp-1/Pikp-2 (D230E K217R)/AVR-PikD	0	1
Pikp-1/Pikp-2 (D230E K217R)/AVR-PikD	0	1
Pikp-1/Pikp-2 (D230E K217R)/AVR-PikD	0	1
Pikp-1/Pikp-2 (D230E K217R)/AVR-PikD	0	1
Pikp-1/Pikp-2 (D230E K217R)/AVR-PikD	0	1
Pikp-1/Pikp-2 (D230E K217R)/AVR-PikD	0	1
Pikp-1/Pikp-2 (D230E K217R)/AVR-PikD	0	1
Pikp-1/Pikp-2 (D230E K217R)/AVR-PikD	0	1
Pikp-1/Pikp-2 (D230E K217R)/AVR-PikD	0	1
Pikp-1/Pikp-2 (D230E K217R)/AVR-PikD	0	1
Pikp-1/Pikp-2 (D230E K217R)/AVR-PikD	0	2
Pikp-1/Pikp-2 (D230E K217R)/AVR-PikD	0	2
Pikp-1/Pikp-2 (D230E K217R)/AVR-PikD	0	2
Pikp-1/Pikp-2 (D230E K217R)/AVR-PikD	0	2
Pikp-1/Pikp-2 (D230E K217R)/AVR-PikD	0	2
Pikp-1/Pikp-2 (D230E K217R)/AVR-PikD	0	2
Pikp-1/Pikp-2 (D230E K217R)/AVR-PikD	0	2
Pikp-1/Pikp-2 (D230E K217R)/AVR-PikD	0	2
Pikp-1/Pikp-2 (D230E K217R)/AVR-PikD	0	2
Pikp-1/Pikp-2 (D230E K217R)/AVR-PikD	0	2
Pikp-1/Pikp-2 (D230E K217R)/AVR-PikD	0	3
Pikp-1/Pikp-2 (D230E K217R)/AVR-PikD	0	3
Pikp-1/Pikp-2 (D230E K217R)/AVR-PikD	0	3
Pikp-1/Pikp-2 (D230E K217R)/AVR-PikD	0	3
Pikp-1/Pikp-2 (D230E K217R)/AVR-PikD	0	3
Pikp-1/Pikp-2 (D230E K217R)/AVR-PikD	0	3
Pikp-1/Pikp-2 (D230E K217R)/AVR-PikD	0	3
Pikp-1/Pikp-2 (D230E K217R)/AVR-PikD	0	3
Pikp-1/Pikp-2 (D230E K217R)/AVR-PikD	0	3
Pikp-1/Pikp-2 (D230E K217R)/AVR-PikD	0	3
Pikp-1/Pikp-2 (D230E)/mCherry 2	6	1
Pikp-1/Pikp-2 (D230E)/mCherry 2	6	1
Pikp-1/Pikp-2 (D230E)/mCherry 2	6	1
Pikp-1/Pikp-2 (D230E)/mCherry 2	6	1
Pikp-1/Pikp-2 (D230E)/mCherry 2	6	1
Pikp-1/Pikp-2 (D230E)/mCherry 2	6	1
Pikp-1/Pikp-2 (D230E)/mCherry 2	6	1
Pikp-1/Pikp-2 (D230E)/mCherry 2	6	1
Pikp-1/Pikp-2 (D230E)/mCherry 2	6	1
Pikp-1/Pikp-2 (D230E)/mCherry 2	6	1
Pikp-1/Pikp-2 (D230E)/mCherry 2	6	1
Pikp-1/Pikp-2 (D230E)/mCherry 2	6	1
Pikp-1/Pikp-2 (D230E)/mCherry 2	6	1
Pikp-1/Pikp-2 (D230E)/mCherry 2	6	1
Pikp-1/Pikp-2 (D230E)/mCherry 2	6	1
Pikp-1/Pikp-2 (D230E)/mCherry 2	6	1
Pikp-1/Pikp-2 (D230E)/mCherry 2	6	1
Pikp-1/Pikp-2 (D230E)/mCherry 2	6	1
Pikp-1/Pikp-2 (D230E)/mCherry 2	6	1
Pikp-1/Pikp-2 (D230E)/mCherry 2	6	1
Pikp-1/Pikp-2 (D230E)/mCherry 2	5	2
Pikp-1/Pikp-2 (D230E)/mCherry 2	4	2
Pikp-1/Pikp-2 (D230E)/mCherry 2	5	2
Pikp-1/Pikp-2 (D230E)/mCherry 2	5	2
Pikp-1/Pikp-2 (D230E)/mCherry 2	4	2
Pikp-1/Pikp-2 (D230E)/mCherry 2	6	2
Pikp-1/Pikp-2 (D230E)/mCherry 2	6	2
Pikp-1/Pikp-2 (D230E)/mCherry 2	6	2
Pikp-1/Pikp-2 (D230E)/mCherry 2	6	2
Pikp-1/Pikp-2 (D230E)/mCherry 2	6	2
Pikp-1/Pikp-2 (D230E)/mCherry 2	6	2
Pikp-1/Pikp-2 (D230E)/mCherry 2	6	2
Pikp-1/Pikp-2 (D230E)/mCherry 2	6	2
Pikp-1/Pikp-2 (D230E)/mCherry 2	6	2
Pikp-1/Pikp-2 (D230E)/mCherry 2	6	2
Pikp-1/Pikp-2 (D230E)/mCherry 2	6	2
Pikp-1/Pikp-2 (D230E)/mCherry 2	6	2
Pikp-1/Pikp-2 (D230E)/mCherry 2	6	2
Pikp-1/Pikp-2 (D230E)/mCherry 2	6	2
Pikp-1/Pikp-2 (D230E)/mCherry 2	6	2
Pikp-1/Pikp-2 (D230E)/mCherry 2	6	3
Pikp-1/Pikp-2 (D230E)/mCherry 2	6	3
Pikp-1/Pikp-2 (D230E)/mCherry 2	6	3
Pikp-1/Pikp-2 (D230E)/mCherry 2	6	3
Pikp-1/Pikp-2 (D230E)/mCherry 2	6	3
Pikp-1/Pikp-2 (D230E)/mCherry 2	6	3
Pikp-1/Pikp-2 (D230E)/mCherry 2	6	3
Pikp-1/Pikp-2 (D230E)/mCherry 2	6	3
Pikp-1/Pikp-2 (D230E)/mCherry 2	6	3
Pikp-1/Pikp-2 (D230E)/mCherry 2	6	3
Pikp-1/Pikp-2 (D230E)/mCherry 2	6	3
Pikp-1/Pikp-2 (D230E)/mCherry 2	6	3
Pikp-1/Pikp-2 (D230E)/mCherry 2	6	3
Pikp-1/Pikp-2 (D230E)/mCherry 2	6	3
Pikp-1/Pikp-2 (D230E)/mCherry 2	6	3
Pikp-1/Pikp-2 (D230E)/mCherry 2	6	3
Pikp-1/Pikp-2 (D230E)/mCherry 2	6	3
Pikp-1/Pikp-2 (D230E)/mCherry 2	6	3
Pikp-1/Pikp-2 (D230E)/mCherry 2	6	3
Pikp-1/Pikp-2 (D230E)/mCherry 2	6	3
Pikp-1/Pikp-2 (D230E D559V)/mCherry	0	1
Pikp-1/Pikp-2 (D230E D559V)/mCherry	0	1
Pikp-1/Pikp-2 (D230E D559V)/mCherry	0	1
Pikp-1/Pikp-2 (D230E D559V)/mCherry	0	1
Pikp-1/Pikp-2 (D230E D559V)/mCherry	0	1
Pikp-1/Pikp-2 (D230E D559V)/mCherry	0	1
Pikp-1/Pikp-2 (D230E D559V)/mCherry	0	1
Pikp-1/Pikp-2 (D230E D559V)/mCherry	0	1
Pikp-1/Pikp-2 (D230E D559V)/mCherry	0	1
Pikp-1/Pikp-2 (D230E D559V)/mCherry	0	1
Pikp-1/Pikp-2 (D230E D559V)/mCherry	0	1
Pikp-1/Pikp-2 (D230E D559V)/mCherry	0	1
Pikp-1/Pikp-2 (D230E D559V)/mCherry	0	1
Pikp-1/Pikp-2 (D230E D559V)/mCherry	0	1
Pikp-1/Pikp-2 (D230E D559V)/mCherry	0	1
Pikp-1/Pikp-2 (D230E D559V)/mCherry	0	1
Pikp-1/Pikp-2 (D230E D559V)/mCherry	0	1
Pikp-1/Pikp-2 (D230E D559V)/mCherry	0	1
Pikp-1/Pikp-2 (D230E D559V)/mCherry	0	1
Pikp-1/Pikp-2 (D230E D559V)/mCherry	0	1
Pikp-1/Pikp-2 (D230E D559V)/mCherry	0	2
Pikp-1/Pikp-2 (D230E D559V)/mCherry	0	2
Pikp-1/Pikp-2 (D230E D559V)/mCherry	0	2
Pikp-1/Pikp-2 (D230E D559V)/mCherry	0	2
Pikp-1/Pikp-2 (D230E D559V)/mCherry	0	2
Pikp-1/Pikp-2 (D230E D559V)/mCherry	0	2
Pikp-1/Pikp-2 (D230E D559V)/mCherry	0	2
Pikp-1/Pikp-2 (D230E D559V)/mCherry	0	2
Pikp-1/Pikp-2 (D230E D559V)/mCherry	0	2
Pikp-1/Pikp-2 (D230E D559V)/mCherry	0	2
Pikp-1/Pikp-2 (D230E D559V)/mCherry	0	2
Pikp-1/Pikp-2 (D230E D559V)/mCherry	0	2
Pikp-1/Pikp-2 (D230E D559V)/mCherry	0	2
Pikp-1/Pikp-2 (D230E D559V)/mCherry	0	2
Pikp-1/Pikp-2 (D230E D559V)/mCherry	0	2
Pikp-1/Pikp-2 (D230E D559V)/mCherry	0	2
Pikp-1/Pikp-2 (D230E D559V)/mCherry	0	2
Pikp-1/Pikp-2 (D230E D559V)/mCherry	0	2
Pikp-1/Pikp-2 (D230E D559V)/mCherry	0	2
Pikp-1/Pikp-2 (D230E D559V)/mCherry	0	2
Pikp-1/Pikp-2 (D230E D559V)/mCherry	0	3
Pikp-1/Pikp-2 (D230E D559V)/mCherry	0	3
Pikp-1/Pikp-2 (D230E D559V)/mCherry	0	3
Pikp-1/Pikp-2 (D230E D559V)/mCherry	0	3
Pikp-1/Pikp-2 (D230E D559V)/mCherry	0	3
Pikp-1/Pikp-2 (D230E D559V)/mCherry	0	3
Pikp-1/Pikp-2 (D230E D559V)/mCherry	0	3
Pikp-1/Pikp-2 (D230E D559V)/mCherry	0	3
Pikp-1/Pikp-2 (D230E D559V)/mCherry	0	3
Pikp-1/Pikp-2 (D230E D559V)/mCherry	0	3
Pikp-1/Pikp-2 (D230E D559V)/mCherry	0	3
Pikp-1/Pikp-2 (D230E D559V)/mCherry	0	3
Pikp-1/Pikp-2 (D230E D559V)/mCherry	0	3
Pikp-1/Pikp-2 (D230E D559V)/mCherry	0	3
Pikp-1/Pikp-2 (D230E D559V)/mCherry	0	3
Pikp-1/Pikp-2 (D230E D559V)/mCherry	0	3
Pikp-1/Pikp-2 (D230E D559V)/mCherry	0	3
Pikp-1/Pikp-2 (D230E D559V)/mCherry	0	3
Pikp-1/Pikp-2 (D230E D559V)/mCherry	0	3
Pikp-1/Pikp-2 (D230E D559V)/mCherry	0	3
Pikp-1/Pikp-2 (D230E)/AVR-PikD 2	6	1
Pikp-1/Pikp-2 (D230E)/AVR-PikD 2	6	1
Pikp-1/Pikp-2 (D230E)/AVR-PikD 2	6	1
Pikp-1/Pikp-2 (D230E)/AVR-PikD 2	6	1
Pikp-1/Pikp-2 (D230E)/AVR-PikD 2	6	1
Pikp-1/Pikp-2 (D230E)/AVR-PikD 2	6	1
Pikp-1/Pikp-2 (D230E)/AVR-PikD 2	6	1
Pikp-1/Pikp-2 (D230E)/AVR-PikD 2	6	1
Pikp-1/Pikp-2 (D230E)/AVR-PikD 2	6	1
Pikp-1/Pikp-2 (D230E)/AVR-PikD 2	6	1
Pikp-1/Pikp-2 (D230E)/AVR-PikD 2	6	2
Pikp-1/Pikp-2 (D230E)/AVR-PikD 2	6	2
Pikp-1/Pikp-2 (D230E)/AVR-PikD 2	6	2
Pikp-1/Pikp-2 (D230E)/AVR-PikD 2	6	2
Pikp-1/Pikp-2 (D230E)/AVR-PikD 2	6	2
Pikp-1/Pikp-2 (D230E)/AVR-PikD 2	6	2
Pikp-1/Pikp-2 (D230E)/AVR-PikD 2	6	2
Pikp-1/Pikp-2 (D230E)/AVR-PikD 2	6	2
Pikp-1/Pikp-2 (D230E)/AVR-PikD 2	6	2
Pikp-1/Pikp-2 (D230E)/AVR-PikD 2	6	2
Pikp-1/Pikp-2 (D230E)/AVR-PikD 2	6	3
Pikp-1/Pikp-2 (D230E)/AVR-PikD 2	6	3
Pikp-1/Pikp-2 (D230E)/AVR-PikD 2	6	3
Pikp-1/Pikp-2 (D230E)/AVR-PikD 2	6	3
Pikp-1/Pikp-2 (D230E)/AVR-PikD 2	6	3
Pikp-1/Pikp-2 (D230E)/AVR-PikD 2	6	3
Pikp-1/Pikp-2 (D230E)/AVR-PikD 2	6	3
Pikp-1/Pikp-2 (D230E)/AVR-PikD 2	6	3
Pikp-1/Pikp-2 (D230E)/AVR-PikD 2	6	3
Pikp-1/Pikp-2 (D230E)/AVR-PikD 2	6	3
Pikp-1/Pikp-2 (D230E D559V)/AVR-PikD	0	1
Pikp-1/Pikp-2 (D230E D559V)/AVR-PikD	0	1
Pikp-1/Pikp-2 (D230E D559V)/AVR-PikD	0	1
Pikp-1/Pikp-2 (D230E D559V)/AVR-PikD	0	1
Pikp-1/Pikp-2 (D230E D559V)/AVR-PikD	0	1
Pikp-1/Pikp-2 (D230E D559V)/AVR-PikD	0	1
Pikp-1/Pikp-2 (D230E D559V)/AVR-PikD	0	1
Pikp-1/Pikp-2 (D230E D559V)/AVR-PikD	0	1
Pikp-1/Pikp-2 (D230E D559V)/AVR-PikD	0	1
Pikp-1/Pikp-2 (D230E D559V)/AVR-PikD	0	1
Pikp-1/Pikp-2 (D230E D559V)/AVR-PikD	0	2
Pikp-1/Pikp-2 (D230E D559V)/AVR-PikD	0	2
Pikp-1/Pikp-2 (D230E D559V)/AVR-PikD	0	2
Pikp-1/Pikp-2 (D230E D559V)/AVR-PikD	0	2
Pikp-1/Pikp-2 (D230E D559V)/AVR-PikD	0	2
Pikp-1/Pikp-2 (D230E D559V)/AVR-PikD	0	2
Pikp-1/Pikp-2 (D230E D559V)/AVR-PikD	0	2
Pikp-1/Pikp-2 (D230E D559V)/AVR-PikD	0	2
Pikp-1/Pikp-2 (D230E D559V)/AVR-PikD	0	2
Pikp-1/Pikp-2 (D230E D559V)/AVR-PikD	0	2
Pikp-1/Pikp-2 (D230E D559V)/AVR-PikD	0	3
Pikp-1/Pikp-2 (D230E D559V)/AVR-PikD	0	3
Pikp-1/Pikp-2 (D230E D559V)/AVR-PikD	0	3
Pikp-1/Pikp-2 (D230E D559V)/AVR-PikD	0	3
Pikp-1/Pikp-2 (D230E D559V)/AVR-PikD	0	3
Pikp-1/Pikp-2 (D230E D559V)/AVR-PikD	0	3
Pikp-1/Pikp-2 (D230E D559V)/AVR-PikD	0	3
Pikp-1/Pikp-2 (D230E D559V)/AVR-PikD	0	3
Pikp-1/Pikp-2 (D230E D559V)/AVR-PikD	0	3
Pikp-1/Pikp-2 (D230E D559V)/AVR-PikD	0	3
