# Supplementary material for: Functional diversification gave rise to allelic specialization in a rice NLR immune receptor pair
Source: eLife. 2021 Nov 16;10:e71662. doi: 10.7554/eLife.71662 (PMC8631799; doi:10.7554/eLife.71662)
Supplement: Figure 6—figure supplement 1—source data 1. [file elife-71662-fig6-figsupp1-data1.csv]

treatment	score	Replicate
Pikp-1/Pikm-2/mCherry	0	1
Pikp-1/Pikm-2/mCherry	0	1
Pikp-1/Pikm-2/mCherry	0	1
Pikp-1/Pikm-2/mCherry	2	1
Pikp-1/Pikm-2/mCherry	2	1
Pikp-1/Pikm-2/mCherry	2	1
Pikp-1/Pikm-2/mCherry	2	1
Pikp-1/Pikm-2/mCherry	3	1
Pikp-1/Pikm-2/mCherry	1	1
Pikp-1/Pikm-2/mCherry	4	1
Pikp-1/Pikm-2/mCherry	2	1
Pikp-1/Pikm-2/mCherry	2	1
Pikp-1/Pikm-2/mCherry	0	1
Pikp-1/Pikm-2/mCherry	0	1
Pikp-1/Pikm-2/mCherry	0	1
Pikp-1/Pikm-2/mCherry	0	1
Pikp-1/Pikm-2/mCherry	2	1
Pikp-1/Pikm-2/mCherry	3	1
Pikp-1/Pikm-2/mCherry	1	1
Pikp-1/Pikm-2/mCherry	0	1
Pikp-1/Pikm-2/mCherry	1	2
Pikp-1/Pikm-2/mCherry	4	2
Pikp-1/Pikm-2/mCherry	2	2
Pikp-1/Pikm-2/mCherry	4	2
Pikp-1/Pikm-2/mCherry	3	2
Pikp-1/Pikm-2/mCherry	3	2
Pikp-1/Pikm-2/mCherry	2	2
Pikp-1/Pikm-2/mCherry	3	2
Pikp-1/Pikm-2/mCherry	1	2
Pikp-1/Pikm-2/mCherry	3	2
Pikp-1/Pikm-2/mCherry	2	2
Pikp-1/Pikm-2/mCherry	2	2
Pikp-1/Pikm-2/mCherry	3	2
Pikp-1/Pikm-2/mCherry	1	2
Pikp-1/Pikm-2/mCherry	3	2
Pikp-1/Pikm-2/mCherry	2	2
Pikp-1/Pikm-2/mCherry	0	2
Pikp-1/Pikm-2/mCherry	3	2
Pikp-1/Pikm-2/mCherry	2	2
Pikp-1/Pikm-2/mCherry	4	2
Pikp-1/Pikm-2/mCherry	6	3
Pikp-1/Pikm-2/mCherry	2	3
Pikp-1/Pikm-2/mCherry	6	3
Pikp-1/Pikm-2/mCherry	3	3
Pikp-1/Pikm-2/mCherry	6	3
Pikp-1/Pikm-2/mCherry	2	3
Pikp-1/Pikm-2/mCherry	6	3
Pikp-1/Pikm-2/mCherry	3	3
Pikp-1/Pikm-2/mCherry	6	3
Pikp-1/Pikm-2/mCherry	3	3
Pikp-1/Pikm-2/mCherry	6	3
Pikp-1/Pikm-2/mCherry	4	3
Pikp-1/Pikm-2/mCherry	6	3
Pikp-1/Pikm-2/mCherry	6	3
Pikp-1/Pikm-2/mCherry	6	3
Pikp-1/Pikm-2/mCherry	6	3
Pikp-1/Pikm-2/mCherry	6	3
Pikp-1/Pikm-2/mCherry	6	3
Pikp-1/Pikm-2/mCherry	5	3
Pikp-1/Pikm-2/mCherry	5	3
Pikp-1/Pikm-2 (E230G)/mCherry	0	1
Pikp-1/Pikm-2 (E230G)/mCherry	0	1
Pikp-1/Pikm-2 (E230G)/mCherry	0	1
Pikp-1/Pikm-2 (E230G)/mCherry	0	1
Pikp-1/Pikm-2 (E230G)/mCherry	0	1
Pikp-1/Pikm-2 (E230G)/mCherry	0	1
Pikp-1/Pikm-2 (E230G)/mCherry	0	1
Pikp-1/Pikm-2 (E230G)/mCherry	0	1
Pikp-1/Pikm-2 (E230G)/mCherry	0	1
Pikp-1/Pikm-2 (E230G)/mCherry	0	1
Pikp-1/Pikm-2 (E230G)/mCherry	0	1
Pikp-1/Pikm-2 (E230G)/mCherry	0	1
Pikp-1/Pikm-2 (E230G)/mCherry	0	1
Pikp-1/Pikm-2 (E230G)/mCherry	0	1
Pikp-1/Pikm-2 (E230G)/mCherry	0	1
Pikp-1/Pikm-2 (E230G)/mCherry	0	1
Pikp-1/Pikm-2 (E230G)/mCherry	0	1
Pikp-1/Pikm-2 (E230G)/mCherry	0	1
Pikp-1/Pikm-2 (E230G)/mCherry	0	1
Pikp-1/Pikm-2 (E230G)/mCherry	0	1
Pikp-1/Pikm-2 (E230G)/mCherry	0	2
Pikp-1/Pikm-2 (E230G)/mCherry	0	2
Pikp-1/Pikm-2 (E230G)/mCherry	0	2
Pikp-1/Pikm-2 (E230G)/mCherry	0	2
Pikp-1/Pikm-2 (E230G)/mCherry	0	2
Pikp-1/Pikm-2 (E230G)/mCherry	0	2
Pikp-1/Pikm-2 (E230G)/mCherry	0	2
Pikp-1/Pikm-2 (E230G)/mCherry	0	2
Pikp-1/Pikm-2 (E230G)/mCherry	0	2
Pikp-1/Pikm-2 (E230G)/mCherry	0	2
Pikp-1/Pikm-2 (E230G)/mCherry	0	2
Pikp-1/Pikm-2 (E230G)/mCherry	0	2
Pikp-1/Pikm-2 (E230G)/mCherry	0	2
Pikp-1/Pikm-2 (E230G)/mCherry	0	2
Pikp-1/Pikm-2 (E230G)/mCherry	0	2
Pikp-1/Pikm-2 (E230G)/mCherry	0	2
Pikp-1/Pikm-2 (E230G)/mCherry	0	2
Pikp-1/Pikm-2 (E230G)/mCherry	0	2
Pikp-1/Pikm-2 (E230G)/mCherry	0	2
Pikp-1/Pikm-2 (E230G)/mCherry	0	2
Pikp-1/Pikm-2 (E230G)/mCherry	0	3
Pikp-1/Pikm-2 (E230G)/mCherry	0	3
Pikp-1/Pikm-2 (E230G)/mCherry	0	3
Pikp-1/Pikm-2 (E230G)/mCherry	0	3
Pikp-1/Pikm-2 (E230G)/mCherry	0	3
Pikp-1/Pikm-2 (E230G)/mCherry	0	3
Pikp-1/Pikm-2 (E230G)/mCherry	0	3
Pikp-1/Pikm-2 (E230G)/mCherry	0	3
Pikp-1/Pikm-2 (E230G)/mCherry	0	3
Pikp-1/Pikm-2 (E230G)/mCherry	0	3
Pikp-1/Pikm-2 (E230G)/mCherry	0	3
Pikp-1/Pikm-2 (E230G)/mCherry	0	3
Pikp-1/Pikm-2 (E230G)/mCherry	0	3
Pikp-1/Pikm-2 (E230G)/mCherry	0	3
Pikp-1/Pikm-2 (E230G)/mCherry	0	3
Pikp-1/Pikm-2 (E230G)/mCherry	0	3
Pikp-1/Pikm-2 (E230G)/mCherry	0	3
Pikp-1/Pikm-2 (E230G)/mCherry	0	3
Pikp-1/Pikm-2 (E230G)/mCherry	0	3
Pikp-1/Pikm-2 (E230G)/mCherry	0	3
Pikp-1/Pikm-2/AVR-PikD	5	1
Pikp-1/Pikm-2/AVR-PikD	4	1
Pikp-1/Pikm-2/AVR-PikD	4	1
Pikp-1/Pikm-2/AVR-PikD	5	1
Pikp-1/Pikm-2/AVR-PikD	4	1
Pikp-1/Pikm-2/AVR-PikD	2	1
Pikp-1/Pikm-2/AVR-PikD	1	1
Pikp-1/Pikm-2/AVR-PikD	4	1
Pikp-1/Pikm-2/AVR-PikD	5	1
Pikp-1/Pikm-2/AVR-PikD	4	1
Pikp-1/Pikm-2/AVR-PikD	6	2
Pikp-1/Pikm-2/AVR-PikD	5	2
Pikp-1/Pikm-2/AVR-PikD	5	2
Pikp-1/Pikm-2/AVR-PikD	5	2
Pikp-1/Pikm-2/AVR-PikD	6	2
Pikp-1/Pikm-2/AVR-PikD	4	2
Pikp-1/Pikm-2/AVR-PikD	6	2
Pikp-1/Pikm-2/AVR-PikD	4	2
Pikp-1/Pikm-2/AVR-PikD	6	2
Pikp-1/Pikm-2/AVR-PikD	6	2
Pikp-1/Pikm-2/AVR-PikD	6	3
Pikp-1/Pikm-2/AVR-PikD	6	3
Pikp-1/Pikm-2/AVR-PikD	6	3
Pikp-1/Pikm-2/AVR-PikD	5	3
Pikp-1/Pikm-2/AVR-PikD	6	3
Pikp-1/Pikm-2/AVR-PikD	6	3
Pikp-1/Pikm-2/AVR-PikD	6	3
Pikp-1/Pikm-2/AVR-PikD	6	3
Pikp-1/Pikm-2/AVR-PikD	6	3
Pikp-1/Pikm-2/AVR-PikD	6	3
Pikp-1/Pikm-2(E230G)/AVR-PikD	4	1
Pikp-1/Pikm-2(E230G)/AVR-PikD	3	1
Pikp-1/Pikm-2(E230G)/AVR-PikD	5	1
Pikp-1/Pikm-2(E230G)/AVR-PikD	5	1
Pikp-1/Pikm-2(E230G)/AVR-PikD	3	1
Pikp-1/Pikm-2(E230G)/AVR-PikD	1	1
Pikp-1/Pikm-2(E230G)/AVR-PikD	0	1
Pikp-1/Pikm-2(E230G)/AVR-PikD	3	1
Pikp-1/Pikm-2(E230G)/AVR-PikD	4	1
Pikp-1/Pikm-2(E230G)/AVR-PikD	3	1
Pikp-1/Pikm-2(E230G)/AVR-PikD	4	2
Pikp-1/Pikm-2(E230G)/AVR-PikD	4	2
Pikp-1/Pikm-2(E230G)/AVR-PikD	3	2
Pikp-1/Pikm-2(E230G)/AVR-PikD	2	2
Pikp-1/Pikm-2(E230G)/AVR-PikD	3	2
Pikp-1/Pikm-2(E230G)/AVR-PikD	2	2
Pikp-1/Pikm-2(E230G)/AVR-PikD	4	2
Pikp-1/Pikm-2(E230G)/AVR-PikD	3	2
Pikp-1/Pikm-2(E230G)/AVR-PikD	4	2
Pikp-1/Pikm-2(E230G)/AVR-PikD	4	2
Pikp-1/Pikm-2(E230G)/AVR-PikD	4	3
Pikp-1/Pikm-2(E230G)/AVR-PikD	4	3
Pikp-1/Pikm-2(E230G)/AVR-PikD	5	3
Pikp-1/Pikm-2(E230G)/AVR-PikD	4	3
Pikp-1/Pikm-2(E230G)/AVR-PikD	6	3
Pikp-1/Pikm-2(E230G)/AVR-PikD	4	3
Pikp-1/Pikm-2(E230G)/AVR-PikD	4	3
Pikp-1/Pikm-2(E230G)/AVR-PikD	4	3
Pikp-1/Pikm-2(E230G)/AVR-PikD	5	3
Pikp-1/Pikm-2(E230G)/AVR-PikD	5	3
Pikm-1/Pikm-2/mCherry	0	1
Pikm-1/Pikm-2/mCherry	0	1
Pikm-1/Pikm-2/mCherry	0	1
Pikm-1/Pikm-2/mCherry	0	1
Pikm-1/Pikm-2/mCherry	0	1
Pikm-1/Pikm-2/mCherry	0	1
Pikm-1/Pikm-2/mCherry	0	1
Pikm-1/Pikm-2/mCherry	0	1
Pikm-1/Pikm-2/mCherry	0	1
Pikm-1/Pikm-2/mCherry	0	1
Pikm-1/Pikm-2/mCherry	0	1
Pikm-1/Pikm-2/mCherry	0	1
Pikm-1/Pikm-2/mCherry	0	1
Pikm-1/Pikm-2/mCherry	0	1
Pikm-1/Pikm-2/mCherry	0	1
Pikm-1/Pikm-2/mCherry	0	1
Pikm-1/Pikm-2/mCherry	0	1
Pikm-1/Pikm-2/mCherry	0	2
Pikm-1/Pikm-2/mCherry	0	2
Pikm-1/Pikm-2/mCherry	0	2
Pikm-1/Pikm-2/mCherry	0	2
Pikm-1/Pikm-2/mCherry	0	2
Pikm-1/Pikm-2/mCherry	0	2
Pikm-1/Pikm-2/mCherry	0	2
Pikm-1/Pikm-2/mCherry	0	2
Pikm-1/Pikm-2/mCherry	0	2
Pikm-1/Pikm-2/mCherry	0	2
Pikm-1/Pikm-2/mCherry	0	2
Pikm-1/Pikm-2/mCherry	0	2
Pikm-1/Pikm-2/mCherry	0	2
Pikm-1/Pikm-2/mCherry	0	2
Pikm-1/Pikm-2/mCherry	0	2
Pikm-1/Pikm-2/mCherry	0	2
Pikm-1/Pikm-2/mCherry	0	2
Pikm-1/Pikm-2/mCherry	0	2
Pikm-1/Pikm-2/mCherry	0	2
Pikm-1/Pikm-2/mCherry	0	2
Pikm-1/Pikm-2/mCherry	0	3
Pikm-1/Pikm-2/mCherry	0	3
Pikm-1/Pikm-2/mCherry	0	3
Pikm-1/Pikm-2/mCherry	0	3
Pikm-1/Pikm-2/mCherry	0	3
Pikm-1/Pikm-2/mCherry	0	3
Pikm-1/Pikm-2/mCherry	0	3
Pikm-1/Pikm-2/mCherry	0	3
Pikm-1/Pikm-2/mCherry	0	3
Pikm-1/Pikm-2/mCherry	0	3
Pikm-1/Pikm-2/mCherry	0	3
Pikm-1/Pikm-2/mCherry	0	3
Pikm-1/Pikm-2/mCherry	0	3
Pikm-1/Pikm-2/mCherry	0	3
Pikm-1/Pikm-2/mCherry	0	3
Pikm-1/Pikm-2/mCherry	0	3
Pikm-1/Pikm-2/mCherry	0	3
Pikm-1/Pikm-2/mCherry	0	3
Pikm-1/Pikm-2/mCherry	0	3
Pikm-1/Pikm-2/mCherry	0	3
Pikm-1/Pikm-2/mCherry	0	3
Pikm-1/Pikm-2/mCherry	0	3
Pikm-1/Pikm-2/mCherry	0	3
Pikm-1/Pikm-2(E230G)/mCherry	0	1
Pikm-1/Pikm-2(E230G)/mCherry	0	1
Pikm-1/Pikm-2(E230G)/mCherry	0	1
Pikm-1/Pikm-2(E230G)/mCherry	0	1
Pikm-1/Pikm-2(E230G)/mCherry	0	1
Pikm-1/Pikm-2(E230G)/mCherry	0	1
Pikm-1/Pikm-2(E230G)/mCherry	0	1
Pikm-1/Pikm-2(E230G)/mCherry	0	1
Pikm-1/Pikm-2(E230G)/mCherry	0	1
Pikm-1/Pikm-2(E230G)/mCherry	0	1
Pikm-1/Pikm-2(E230G)/mCherry	0	1
Pikm-1/Pikm-2(E230G)/mCherry	0	1
Pikm-1/Pikm-2(E230G)/mCherry	0	1
Pikm-1/Pikm-2(E230G)/mCherry	0	1
Pikm-1/Pikm-2(E230G)/mCherry	0	1
Pikm-1/Pikm-2(E230G)/mCherry	0	1
Pikm-1/Pikm-2(E230G)/mCherry	0	1
Pikm-1/Pikm-2(E230G)/mCherry	0	1
Pikm-1/Pikm-2(E230G)/mCherry	0	2
Pikm-1/Pikm-2(E230G)/mCherry	0	2
Pikm-1/Pikm-2(E230G)/mCherry	0	2
Pikm-1/Pikm-2(E230G)/mCherry	0	2
Pikm-1/Pikm-2(E230G)/mCherry	0	2
Pikm-1/Pikm-2(E230G)/mCherry	0	2
Pikm-1/Pikm-2(E230G)/mCherry	0	2
Pikm-1/Pikm-2(E230G)/mCherry	0	2
Pikm-1/Pikm-2(E230G)/mCherry	0	2
Pikm-1/Pikm-2(E230G)/mCherry	0	2
Pikm-1/Pikm-2(E230G)/mCherry	0	2
Pikm-1/Pikm-2(E230G)/mCherry	0	2
Pikm-1/Pikm-2(E230G)/mCherry	0	2
Pikm-1/Pikm-2(E230G)/mCherry	0	2
Pikm-1/Pikm-2(E230G)/mCherry	0	2
Pikm-1/Pikm-2(E230G)/mCherry	0	2
Pikm-1/Pikm-2(E230G)/mCherry	0	2
Pikm-1/Pikm-2(E230G)/mCherry	0	2
Pikm-1/Pikm-2(E230G)/mCherry	0	2
Pikm-1/Pikm-2(E230G)/mCherry	0	3
Pikm-1/Pikm-2(E230G)/mCherry	0	3
Pikm-1/Pikm-2(E230G)/mCherry	0	3
Pikm-1/Pikm-2(E230G)/mCherry	0	3
Pikm-1/Pikm-2(E230G)/mCherry	0	3
Pikm-1/Pikm-2(E230G)/mCherry	0	3
Pikm-1/Pikm-2(E230G)/mCherry	0	3
Pikm-1/Pikm-2(E230G)/mCherry	0	3
Pikm-1/Pikm-2(E230G)/mCherry	0	3
Pikm-1/Pikm-2(E230G)/mCherry	0	3
Pikm-1/Pikm-2(E230G)/mCherry	0	3
Pikm-1/Pikm-2(E230G)/mCherry	0	3
Pikm-1/Pikm-2(E230G)/mCherry	0	3
Pikm-1/Pikm-2(E230G)/mCherry	0	3
Pikm-1/Pikm-2(E230G)/mCherry	0	3
Pikm-1/Pikm-2(E230G)/mCherry	0	3
Pikm-1/Pikm-2(E230G)/mCherry	0	3
Pikm-1/Pikm-2(E230G)/mCherry	0	3
Pikm-1/Pikm-2(E230G)/mCherry	0	3
Pikm-1/Pikm-2(E230G)/mCherry	0	3
Pikm-1/Pikm-2(E230G)/mCherry	0	3
Pikm-1/Pikm-2(E230G)/mCherry	0	3
Pikm-1/Pikm-2(E230G)/mCherry	0	3
Pikm-1/Pikm-2/AVR-PikD	4	1
Pikm-1/Pikm-2/AVR-PikD	3	1
Pikm-1/Pikm-2/AVR-PikD	4	1
Pikm-1/Pikm-2/AVR-PikD	3	1
Pikm-1/Pikm-2/AVR-PikD	5	1
Pikm-1/Pikm-2/AVR-PikD	3	1
Pikm-1/Pikm-2/AVR-PikD	5	1
Pikm-1/Pikm-2/AVR-PikD	3	1
Pikm-1/Pikm-2/AVR-PikD	5	1
Pikm-1/Pikm-2/AVR-PikD	4	2
Pikm-1/Pikm-2/AVR-PikD	4	2
Pikm-1/Pikm-2/AVR-PikD	3	2
Pikm-1/Pikm-2/AVR-PikD	5	2
Pikm-1/Pikm-2/AVR-PikD	6	2
Pikm-1/Pikm-2/AVR-PikD	5	2
Pikm-1/Pikm-2/AVR-PikD	5	2
Pikm-1/Pikm-2/AVR-PikD	5	2
Pikm-1/Pikm-2/AVR-PikD	5	2
Pikm-1/Pikm-2/AVR-PikD	5	2
Pikm-1/Pikm-2/AVR-PikD	5	3
Pikm-1/Pikm-2/AVR-PikD	6	3
Pikm-1/Pikm-2/AVR-PikD	6	3
Pikm-1/Pikm-2/AVR-PikD	6	3
Pikm-1/Pikm-2/AVR-PikD	6	3
Pikm-1/Pikm-2/AVR-PikD	6	3
Pikm-1/Pikm-2/AVR-PikD	6	3
Pikm-1/Pikm-2/AVR-PikD	6	3
Pikm-1/Pikm-2/AVR-PikD	6	3
Pikm-1/Pikm-2/AVR-PikD	6	3
Pikm-1/Pikm-2(E230G)/AVR-PikD	6	1
Pikm-1/Pikm-2(E230G)/AVR-PikD	3	1
Pikm-1/Pikm-2(E230G)/AVR-PikD	2	1
Pikm-1/Pikm-2(E230G)/AVR-PikD	3	1
Pikm-1/Pikm-2(E230G)/AVR-PikD	3	1
Pikm-1/Pikm-2(E230G)/AVR-PikD	3	1
Pikm-1/Pikm-2(E230G)/AVR-PikD	2	1
Pikm-1/Pikm-2(E230G)/AVR-PikD	4	1
Pikm-1/Pikm-2(E230G)/AVR-PikD	1	1
Pikm-1/Pikm-2(E230G)/AVR-PikD	3	2
Pikm-1/Pikm-2(E230G)/AVR-PikD	4	2
Pikm-1/Pikm-2(E230G)/AVR-PikD	1	2
Pikm-1/Pikm-2(E230G)/AVR-PikD	1	2
Pikm-1/Pikm-2(E230G)/AVR-PikD	1	2
Pikm-1/Pikm-2(E230G)/AVR-PikD	2	2
Pikm-1/Pikm-2(E230G)/AVR-PikD	2	2
Pikm-1/Pikm-2(E230G)/AVR-PikD	2	2
Pikm-1/Pikm-2(E230G)/AVR-PikD	1	2
Pikm-1/Pikm-2(E230G)/AVR-PikD	3	2
Pikm-1/Pikm-2(E230G)/AVR-PikD	3	3
Pikm-1/Pikm-2(E230G)/AVR-PikD	2	3
Pikm-1/Pikm-2(E230G)/AVR-PikD	3	3
Pikm-1/Pikm-2(E230G)/AVR-PikD	6	3
Pikm-1/Pikm-2(E230G)/AVR-PikD	4	3
Pikm-1/Pikm-2(E230G)/AVR-PikD	4	3
Pikm-1/Pikm-2(E230G)/AVR-PikD	3	3
Pikm-1/Pikm-2(E230G)/AVR-PikD	3	3
Pikm-1/Pikm-2(E230G)/AVR-PikD	3	3
Pikm-1/Pikm-2(E230G)/AVR-PikD	3	3
Pikm-1/Pikm-2(E230G)/AVR-PikD	4	3
Pikm-1/Pikm-2(E230G)/AVR-PikD	4	3
