# Supplementary material for: Functional diversification gave rise to allelic specialization in a rice NLR immune receptor pair
Source: eLife. 2021 Nov 16;10:e71662. doi: 10.7554/eLife.71662 (PMC8631799; doi:10.7554/eLife.71662)
Supplement: Figure 9—figure supplement 2—source data 1. [file elife-71662-fig9-figsupp2-data1.csv]

treatment	Score	Replicate
Pikp-1/Pikp-2/Pikm-2 (0)	0	1
Pikp-1/Pikp-2/Pikm-2 (0)	0	1
Pikp-1/Pikp-2/Pikm-2 (0)	0	1
Pikp-1/Pikp-2/Pikm-2 (0)	0	1
Pikp-1/Pikp-2/Pikm-2 (0)	0	1
Pikp-1/Pikp-2/Pikm-2 (0)	0	1
Pikp-1/Pikp-2/Pikm-2 (0)	0	1
Pikp-1/Pikp-2/Pikm-2 (0)	0	1
Pikp-1/Pikp-2/Pikm-2 (0)	0	1
Pikp-1/Pikp-2/Pikm-2 (0)	0	1
Pikp-1/Pikp-2/Pikm-2 (0)	0	2
Pikp-1/Pikp-2/Pikm-2 (0)	0	2
Pikp-1/Pikp-2/Pikm-2 (0)	0	2
Pikp-1/Pikp-2/Pikm-2 (0)	0	2
Pikp-1/Pikp-2/Pikm-2 (0)	0	2
Pikp-1/Pikp-2/Pikm-2 (0)	0	2
Pikp-1/Pikp-2/Pikm-2 (0)	0	2
Pikp-1/Pikp-2/Pikm-2 (0)	0	2
Pikp-1/Pikp-2/Pikm-2 (0)	0	2
Pikp-1/Pikp-2/Pikm-2 (0)	0	2
Pikp-1/Pikp-2/Pikm-2 (0)	0	3
Pikp-1/Pikp-2/Pikm-2 (0)	0	3
Pikp-1/Pikp-2/Pikm-2 (0)	0	3
Pikp-1/Pikp-2/Pikm-2 (0)	0	3
Pikp-1/Pikp-2/Pikm-2 (0)	0	3
Pikp-1/Pikp-2/Pikm-2 (0)	0	3
Pikp-1/Pikp-2/Pikm-2 (0)	0	3
Pikp-1/Pikp-2/Pikm-2 (0)	0	3
Pikp-1/Pikp-2/Pikm-2 (0)	0	3
Pikp-1/Pikp-2/Pikm-2 (0)	0	3
Pikp-1/Pikp-2/Pikm-2 (0.1)	0	1
Pikp-1/Pikp-2/Pikm-2 (0.1)	0	1
Pikp-1/Pikp-2/Pikm-2 (0.1)	0	1
Pikp-1/Pikp-2/Pikm-2 (0.1)	0	1
Pikp-1/Pikp-2/Pikm-2 (0.1)	0	1
Pikp-1/Pikp-2/Pikm-2 (0.1)	0	1
Pikp-1/Pikp-2/Pikm-2 (0.1)	0	1
Pikp-1/Pikp-2/Pikm-2 (0.1)	0	1
Pikp-1/Pikp-2/Pikm-2 (0.1)	0	1
Pikp-1/Pikp-2/Pikm-2 (0.1)	0	1
Pikp-1/Pikp-2/Pikm-2 (0.1)	0	2
Pikp-1/Pikp-2/Pikm-2 (0.1)	0	2
Pikp-1/Pikp-2/Pikm-2 (0.1)	0	2
Pikp-1/Pikp-2/Pikm-2 (0.1)	0	2
Pikp-1/Pikp-2/Pikm-2 (0.1)	0	2
Pikp-1/Pikp-2/Pikm-2 (0.1)	0	2
Pikp-1/Pikp-2/Pikm-2 (0.1)	0	2
Pikp-1/Pikp-2/Pikm-2 (0.1)	0	2
Pikp-1/Pikp-2/Pikm-2 (0.1)	0	2
Pikp-1/Pikp-2/Pikm-2 (0.1)	0	2
Pikp-1/Pikp-2/Pikm-2 (0.1)	0	3
Pikp-1/Pikp-2/Pikm-2 (0.1)	0	3
Pikp-1/Pikp-2/Pikm-2 (0.1)	0	3
Pikp-1/Pikp-2/Pikm-2 (0.1)	0	3
Pikp-1/Pikp-2/Pikm-2 (0.1)	0	3
Pikp-1/Pikp-2/Pikm-2 (0.1)	0	3
Pikp-1/Pikp-2/Pikm-2 (0.1)	0	3
Pikp-1/Pikp-2/Pikm-2 (0.1)	0	3
Pikp-1/Pikp-2/Pikm-2 (0.1)	0	3
Pikp-1/Pikp-2/Pikm-2 (0.1)	0	3
Pikp-1/Pikp-2/Pikm-2 (0.2)	0	1
Pikp-1/Pikp-2/Pikm-2 (0.2)	0	1
Pikp-1/Pikp-2/Pikm-2 (0.2)	0	1
Pikp-1/Pikp-2/Pikm-2 (0.2)	0	1
Pikp-1/Pikp-2/Pikm-2 (0.2)	0	1
Pikp-1/Pikp-2/Pikm-2 (0.2)	0	1
Pikp-1/Pikp-2/Pikm-2 (0.2)	0	1
Pikp-1/Pikp-2/Pikm-2 (0.2)	0	1
Pikp-1/Pikp-2/Pikm-2 (0.2)	0	1
Pikp-1/Pikp-2/Pikm-2 (0.2)	0	1
Pikp-1/Pikp-2/Pikm-2 (0.2)	0	2
Pikp-1/Pikp-2/Pikm-2 (0.2)	0	2
Pikp-1/Pikp-2/Pikm-2 (0.2)	0	2
Pikp-1/Pikp-2/Pikm-2 (0.2)	0	2
Pikp-1/Pikp-2/Pikm-2 (0.2)	0	2
Pikp-1/Pikp-2/Pikm-2 (0.2)	0	2
Pikp-1/Pikp-2/Pikm-2 (0.2)	0	2
Pikp-1/Pikp-2/Pikm-2 (0.2)	0	2
Pikp-1/Pikp-2/Pikm-2 (0.2)	0	2
Pikp-1/Pikp-2/Pikm-2 (0.2)	0	2
Pikp-1/Pikp-2/Pikm-2 (0.2)	0	3
Pikp-1/Pikp-2/Pikm-2 (0.2)	0	3
Pikp-1/Pikp-2/Pikm-2 (0.2)	0	3
Pikp-1/Pikp-2/Pikm-2 (0.2)	0	3
Pikp-1/Pikp-2/Pikm-2 (0.2)	0	3
Pikp-1/Pikp-2/Pikm-2 (0.2)	0	3
Pikp-1/Pikp-2/Pikm-2 (0.2)	0	3
Pikp-1/Pikp-2/Pikm-2 (0.2)	0	3
Pikp-1/Pikp-2/Pikm-2 (0.2)	0	3
Pikp-1/Pikp-2/Pikm-2 (0.2)	0	3
Pikp-1/Pikp-2/Pikm-2 (0.3)	0	1
Pikp-1/Pikp-2/Pikm-2 (0.3)	0	1
Pikp-1/Pikp-2/Pikm-2 (0.3)	0	1
Pikp-1/Pikp-2/Pikm-2 (0.3)	0	1
Pikp-1/Pikp-2/Pikm-2 (0.3)	0	1
Pikp-1/Pikp-2/Pikm-2 (0.3)	0	1
Pikp-1/Pikp-2/Pikm-2 (0.3)	0	1
Pikp-1/Pikp-2/Pikm-2 (0.3)	0	1
Pikp-1/Pikp-2/Pikm-2 (0.3)	0	1
Pikp-1/Pikp-2/Pikm-2 (0.3)	0	1
Pikp-1/Pikp-2/Pikm-2 (0.3)	0	2
Pikp-1/Pikp-2/Pikm-2 (0.3)	1	2
Pikp-1/Pikp-2/Pikm-2 (0.3)	0	2
Pikp-1/Pikp-2/Pikm-2 (0.3)	1	2
Pikp-1/Pikp-2/Pikm-2 (0.3)	0	2
Pikp-1/Pikp-2/Pikm-2 (0.3)	0	2
Pikp-1/Pikp-2/Pikm-2 (0.3)	0	2
Pikp-1/Pikp-2/Pikm-2 (0.3)	0	2
Pikp-1/Pikp-2/Pikm-2 (0.3)	0	2
Pikp-1/Pikp-2/Pikm-2 (0.3)	0	2
Pikp-1/Pikp-2/Pikm-2 (0.3)	0	3
Pikp-1/Pikp-2/Pikm-2 (0.3)	1	3
Pikp-1/Pikp-2/Pikm-2 (0.3)	0	3
Pikp-1/Pikp-2/Pikm-2 (0.3)	0	3
Pikp-1/Pikp-2/Pikm-2 (0.3)	0	3
Pikp-1/Pikp-2/Pikm-2 (0.3)	0	3
Pikp-1/Pikp-2/Pikm-2 (0.3)	0	3
Pikp-1/Pikp-2/Pikm-2 (0.3)	0	3
Pikp-1/Pikp-2/Pikm-2 (0.3)	0	3
Pikp-1/Pikp-2/Pikm-2 (0.3)	0	3
Pikp-1/Pikp-2/Pikm-2 (0.4)	0	1
Pikp-1/Pikp-2/Pikm-2 (0.4)	0	1
Pikp-1/Pikp-2/Pikm-2 (0.4)	0	1
Pikp-1/Pikp-2/Pikm-2 (0.4)	0	1
Pikp-1/Pikp-2/Pikm-2 (0.4)	0	1
Pikp-1/Pikp-2/Pikm-2 (0.4)	0	1
Pikp-1/Pikp-2/Pikm-2 (0.4)	0	1
Pikp-1/Pikp-2/Pikm-2 (0.4)	0	1
Pikp-1/Pikp-2/Pikm-2 (0.4)	0	1
Pikp-1/Pikp-2/Pikm-2 (0.4)	0	1
Pikp-1/Pikp-2/Pikm-2 (0.4)	0	2
Pikp-1/Pikp-2/Pikm-2 (0.4)	2	2
Pikp-1/Pikp-2/Pikm-2 (0.4)	0	2
Pikp-1/Pikp-2/Pikm-2 (0.4)	1	2
Pikp-1/Pikp-2/Pikm-2 (0.4)	0	2
Pikp-1/Pikp-2/Pikm-2 (0.4)	1	2
Pikp-1/Pikp-2/Pikm-2 (0.4)	0	2
Pikp-1/Pikp-2/Pikm-2 (0.4)	1	2
Pikp-1/Pikp-2/Pikm-2 (0.4)	0	2
Pikp-1/Pikp-2/Pikm-2 (0.4)	0	2
Pikp-1/Pikp-2/Pikm-2 (0.4)	0	3
Pikp-1/Pikp-2/Pikm-2 (0.4)	0	3
Pikp-1/Pikp-2/Pikm-2 (0.4)	0	3
Pikp-1/Pikp-2/Pikm-2 (0.4)	1	3
Pikp-1/Pikp-2/Pikm-2 (0.4)	1	3
Pikp-1/Pikp-2/Pikm-2 (0.4)	1	3
Pikp-1/Pikp-2/Pikm-2 (0.4)	0	3
Pikp-1/Pikp-2/Pikm-2 (0.4)	1	3
Pikp-1/Pikp-2/Pikm-2 (0.4)	0	3
Pikp-1/Pikp-2/Pikm-2 (0.4)	0	3
Pikp-1/Pikp-2/Pikm-2 (0.6)	0	1
Pikp-1/Pikp-2/Pikm-2 (0.6)	0	1
Pikp-1/Pikp-2/Pikm-2 (0.6)	0	1
Pikp-1/Pikp-2/Pikm-2 (0.6)	0	1
Pikp-1/Pikp-2/Pikm-2 (0.6)	0	1
Pikp-1/Pikp-2/Pikm-2 (0.6)	0	1
Pikp-1/Pikp-2/Pikm-2 (0.6)	0	1
Pikp-1/Pikp-2/Pikm-2 (0.6)	0	1
Pikp-1/Pikp-2/Pikm-2 (0.6)	0	1
Pikp-1/Pikp-2/Pikm-2 (0.6)	0	1
Pikp-1/Pikp-2/Pikm-2 (0.6)	0	2
Pikp-1/Pikp-2/Pikm-2 (0.6)	1	2
Pikp-1/Pikp-2/Pikm-2 (0.6)	0	2
Pikp-1/Pikp-2/Pikm-2 (0.6)	1	2
Pikp-1/Pikp-2/Pikm-2 (0.6)	0	2
Pikp-1/Pikp-2/Pikm-2 (0.6)	1	2
Pikp-1/Pikp-2/Pikm-2 (0.6)	1	2
Pikp-1/Pikp-2/Pikm-2 (0.6)	1	2
Pikp-1/Pikp-2/Pikm-2 (0.6)	0	2
Pikp-1/Pikp-2/Pikm-2 (0.6)	0	2
Pikp-1/Pikp-2/Pikm-2 (0.6)	1	3
Pikp-1/Pikp-2/Pikm-2 (0.6)	0	3
Pikp-1/Pikp-2/Pikm-2 (0.6)	1	3
Pikp-1/Pikp-2/Pikm-2 (0.6)	1	3
Pikp-1/Pikp-2/Pikm-2 (0.6)	0	3
Pikp-1/Pikp-2/Pikm-2 (0.6)	1	3
Pikp-1/Pikp-2/Pikm-2 (0.6)	1	3
Pikp-1/Pikp-2/Pikm-2 (0.6)	1	3
Pikp-1/Pikp-2/Pikm-2 (0.6)	0	3
Pikp-1/Pikp-2/Pikm-2 (0.6)	0	3
