# Supplementary material for: Functional diversification gave rise to allelic specialization in a rice NLR immune receptor pair
Source: eLife. 2021 Nov 16;10:e71662. doi: 10.7554/eLife.71662 (PMC8631799; doi:10.7554/eLife.71662)
Supplement: Figure 11—source data 1. [file elife-71662-fig11-data1.csv]

treatment	Score	Replicate
Pikp-1/Pikp-2 (D230E)/Pikp-2 (K217R) (0)	6	1
Pikp-1/Pikp-2 (D230E)/Pikp-2 (K217R) (0)	6	1
Pikp-1/Pikp-2 (D230E)/Pikp-2 (K217R) (0)	6	1
Pikp-1/Pikp-2 (D230E)/Pikp-2 (K217R) (0)	6	1
Pikp-1/Pikp-2 (D230E)/Pikp-2 (K217R) (0)	6	1
Pikp-1/Pikp-2 (D230E)/Pikp-2 (K217R) (0)	6	1
Pikp-1/Pikp-2 (D230E)/Pikp-2 (K217R) (0)	6	1
Pikp-1/Pikp-2 (D230E)/Pikp-2 (K217R) (0)	6	1
Pikp-1/Pikp-2 (D230E)/Pikp-2 (K217R) (0)	6	1
Pikp-1/Pikp-2 (D230E)/Pikp-2 (K217R) (0)	6	1
Pikp-1/Pikp-2 (D230E)/Pikp-2 (K217R) (0)	6	2
Pikp-1/Pikp-2 (D230E)/Pikp-2 (K217R) (0)	6	2
Pikp-1/Pikp-2 (D230E)/Pikp-2 (K217R) (0)	6	2
Pikp-1/Pikp-2 (D230E)/Pikp-2 (K217R) (0)	6	2
Pikp-1/Pikp-2 (D230E)/Pikp-2 (K217R) (0)	6	2
Pikp-1/Pikp-2 (D230E)/Pikp-2 (K217R) (0)	6	2
Pikp-1/Pikp-2 (D230E)/Pikp-2 (K217R) (0)	6	2
Pikp-1/Pikp-2 (D230E)/Pikp-2 (K217R) (0)	6	2
Pikp-1/Pikp-2 (D230E)/Pikp-2 (K217R) (0)	6	2
Pikp-1/Pikp-2 (D230E)/Pikp-2 (K217R) (0)	6	2
Pikp-1/Pikp-2 (D230E)/Pikp-2 (K217R) (0)	6	3
Pikp-1/Pikp-2 (D230E)/Pikp-2 (K217R) (0)	6	3
Pikp-1/Pikp-2 (D230E)/Pikp-2 (K217R) (0)	6	3
Pikp-1/Pikp-2 (D230E)/Pikp-2 (K217R) (0)	6	3
Pikp-1/Pikp-2 (D230E)/Pikp-2 (K217R) (0)	6	3
Pikp-1/Pikp-2 (D230E)/Pikp-2 (K217R) (0)	6	3
Pikp-1/Pikp-2 (D230E)/Pikp-2 (K217R) (0)	6	3
Pikp-1/Pikp-2 (D230E)/Pikp-2 (K217R) (0)	6	3
Pikp-1/Pikp-2 (D230E)/Pikp-2 (K217R) (0)	6	3
Pikp-1/Pikp-2 (D230E)/Pikp-2 (K217R) (0)	6	3
Pikp-1/Pikp-2 (D230E)/Pikp-2 (K217R) (0)	6	4
Pikp-1/Pikp-2 (D230E)/Pikp-2 (K217R) (0)	6	4
Pikp-1/Pikp-2 (D230E)/Pikp-2 (K217R) (0)	6	4
Pikp-1/Pikp-2 (D230E)/Pikp-2 (K217R) (0)	6	4
Pikp-1/Pikp-2 (D230E)/Pikp-2 (K217R) (0)	6	4
Pikp-1/Pikp-2 (D230E)/Pikp-2 (K217R) (0)	6	4
Pikp-1/Pikp-2 (D230E)/Pikp-2 (K217R) (0)	6	4
Pikp-1/Pikp-2 (D230E)/Pikp-2 (K217R) (0)	6	4
Pikp-1/Pikp-2 (D230E)/Pikp-2 (K217R) (0)	6	4
Pikp-1/Pikp-2 (D230E)/Pikp-2 (K217R) (0)	6	4
Pikp-1/Pikp-2 (D230E)/Pikp-2 (K217R) (0.1)	6	1
Pikp-1/Pikp-2 (D230E)/Pikp-2 (K217R) (0.1)	6	1
Pikp-1/Pikp-2 (D230E)/Pikp-2 (K217R) (0.1)	6	1
Pikp-1/Pikp-2 (D230E)/Pikp-2 (K217R) (0.1)	6	1
Pikp-1/Pikp-2 (D230E)/Pikp-2 (K217R) (0.1)	6	1
Pikp-1/Pikp-2 (D230E)/Pikp-2 (K217R) (0.1)	6	1
Pikp-1/Pikp-2 (D230E)/Pikp-2 (K217R) (0.1)	6	1
Pikp-1/Pikp-2 (D230E)/Pikp-2 (K217R) (0.1)	6	1
Pikp-1/Pikp-2 (D230E)/Pikp-2 (K217R) (0.1)	6	1
Pikp-1/Pikp-2 (D230E)/Pikp-2 (K217R) (0.1)	6	1
Pikp-1/Pikp-2 (D230E)/Pikp-2 (K217R) (0.1)	6	2
Pikp-1/Pikp-2 (D230E)/Pikp-2 (K217R) (0.1)	6	2
Pikp-1/Pikp-2 (D230E)/Pikp-2 (K217R) (0.1)	6	2
Pikp-1/Pikp-2 (D230E)/Pikp-2 (K217R) (0.1)	6	2
Pikp-1/Pikp-2 (D230E)/Pikp-2 (K217R) (0.1)	6	2
Pikp-1/Pikp-2 (D230E)/Pikp-2 (K217R) (0.1)	6	2
Pikp-1/Pikp-2 (D230E)/Pikp-2 (K217R) (0.1)	6	2
Pikp-1/Pikp-2 (D230E)/Pikp-2 (K217R) (0.1)	6	2
Pikp-1/Pikp-2 (D230E)/Pikp-2 (K217R) (0.1)	6	2
Pikp-1/Pikp-2 (D230E)/Pikp-2 (K217R) (0.1)	6	2
Pikp-1/Pikp-2 (D230E)/Pikp-2 (K217R) (0.1)	6	3
Pikp-1/Pikp-2 (D230E)/Pikp-2 (K217R) (0.1)	6	3
Pikp-1/Pikp-2 (D230E)/Pikp-2 (K217R) (0.1)	6	3
Pikp-1/Pikp-2 (D230E)/Pikp-2 (K217R) (0.1)	6	3
Pikp-1/Pikp-2 (D230E)/Pikp-2 (K217R) (0.1)	6	3
Pikp-1/Pikp-2 (D230E)/Pikp-2 (K217R) (0.1)	6	3
Pikp-1/Pikp-2 (D230E)/Pikp-2 (K217R) (0.1)	6	3
Pikp-1/Pikp-2 (D230E)/Pikp-2 (K217R) (0.1)	6	3
Pikp-1/Pikp-2 (D230E)/Pikp-2 (K217R) (0.1)	6	3
Pikp-1/Pikp-2 (D230E)/Pikp-2 (K217R) (0.1)	6	3
Pikp-1/Pikp-2 (D230E)/Pikp-2 (K217R) (0.1)	6	4
Pikp-1/Pikp-2 (D230E)/Pikp-2 (K217R) (0.1)	6	4
Pikp-1/Pikp-2 (D230E)/Pikp-2 (K217R) (0.1)	6	4
Pikp-1/Pikp-2 (D230E)/Pikp-2 (K217R) (0.1)	6	4
Pikp-1/Pikp-2 (D230E)/Pikp-2 (K217R) (0.1)	6	4
Pikp-1/Pikp-2 (D230E)/Pikp-2 (K217R) (0.1)	6	4
Pikp-1/Pikp-2 (D230E)/Pikp-2 (K217R) (0.1)	6	4
Pikp-1/Pikp-2 (D230E)/Pikp-2 (K217R) (0.1)	6	4
Pikp-1/Pikp-2 (D230E)/Pikp-2 (K217R) (0.1)	6	4
Pikp-1/Pikp-2 (D230E)/Pikp-2 (K217R) (0.1)	6	4
Pikp-1/Pikp-2 (D230E)/Pikp-2 (K217R) (0.2)	6	1
Pikp-1/Pikp-2 (D230E)/Pikp-2 (K217R) (0.2)	6	1
Pikp-1/Pikp-2 (D230E)/Pikp-2 (K217R) (0.2)	6	1
Pikp-1/Pikp-2 (D230E)/Pikp-2 (K217R) (0.2)	6	1
Pikp-1/Pikp-2 (D230E)/Pikp-2 (K217R) (0.2)	6	1
Pikp-1/Pikp-2 (D230E)/Pikp-2 (K217R) (0.2)	6	1
Pikp-1/Pikp-2 (D230E)/Pikp-2 (K217R) (0.2)	6	1
Pikp-1/Pikp-2 (D230E)/Pikp-2 (K217R) (0.2)	6	1
Pikp-1/Pikp-2 (D230E)/Pikp-2 (K217R) (0.2)	6	1
Pikp-1/Pikp-2 (D230E)/Pikp-2 (K217R) (0.2)	6	1
Pikp-1/Pikp-2 (D230E)/Pikp-2 (K217R) (0.2)	6	2
Pikp-1/Pikp-2 (D230E)/Pikp-2 (K217R) (0.2)	6	2
Pikp-1/Pikp-2 (D230E)/Pikp-2 (K217R) (0.2)	6	2
Pikp-1/Pikp-2 (D230E)/Pikp-2 (K217R) (0.2)	6	2
Pikp-1/Pikp-2 (D230E)/Pikp-2 (K217R) (0.2)	6	2
Pikp-1/Pikp-2 (D230E)/Pikp-2 (K217R) (0.2)	6	2
Pikp-1/Pikp-2 (D230E)/Pikp-2 (K217R) (0.2)	6	2
Pikp-1/Pikp-2 (D230E)/Pikp-2 (K217R) (0.2)	6	2
Pikp-1/Pikp-2 (D230E)/Pikp-2 (K217R) (0.2)	6	2
Pikp-1/Pikp-2 (D230E)/Pikp-2 (K217R) (0.2)	6	2
Pikp-1/Pikp-2 (D230E)/Pikp-2 (K217R) (0.2)	6	3
Pikp-1/Pikp-2 (D230E)/Pikp-2 (K217R) (0.2)	6	3
Pikp-1/Pikp-2 (D230E)/Pikp-2 (K217R) (0.2)	6	3
Pikp-1/Pikp-2 (D230E)/Pikp-2 (K217R) (0.2)	6	3
Pikp-1/Pikp-2 (D230E)/Pikp-2 (K217R) (0.2)	6	3
Pikp-1/Pikp-2 (D230E)/Pikp-2 (K217R) (0.2)	6	3
Pikp-1/Pikp-2 (D230E)/Pikp-2 (K217R) (0.2)	6	3
Pikp-1/Pikp-2 (D230E)/Pikp-2 (K217R) (0.2)	6	3
Pikp-1/Pikp-2 (D230E)/Pikp-2 (K217R) (0.2)	6	3
Pikp-1/Pikp-2 (D230E)/Pikp-2 (K217R) (0.2)	6	3
Pikp-1/Pikp-2 (D230E)/Pikp-2 (K217R) (0.2)	6	4
Pikp-1/Pikp-2 (D230E)/Pikp-2 (K217R) (0.2)	6	4
Pikp-1/Pikp-2 (D230E)/Pikp-2 (K217R) (0.2)	6	4
Pikp-1/Pikp-2 (D230E)/Pikp-2 (K217R) (0.2)	6	4
Pikp-1/Pikp-2 (D230E)/Pikp-2 (K217R) (0.2)	6	4
Pikp-1/Pikp-2 (D230E)/Pikp-2 (K217R) (0.2)	6	4
Pikp-1/Pikp-2 (D230E)/Pikp-2 (K217R) (0.2)	6	4
Pikp-1/Pikp-2 (D230E)/Pikp-2 (K217R) (0.2)	6	4
Pikp-1/Pikp-2 (D230E)/Pikp-2 (K217R) (0.2)	6	4
Pikp-1/Pikp-2 (D230E)/Pikp-2 (K217R) (0.2)	6	4
Pikp-1/Pikp-2 (D230E)/Pikp-2 (K217R) (0.3)	6	1
Pikp-1/Pikp-2 (D230E)/Pikp-2 (K217R) (0.3)	6	1
Pikp-1/Pikp-2 (D230E)/Pikp-2 (K217R) (0.3)	6	1
Pikp-1/Pikp-2 (D230E)/Pikp-2 (K217R) (0.3)	6	1
Pikp-1/Pikp-2 (D230E)/Pikp-2 (K217R) (0.3)	6	1
Pikp-1/Pikp-2 (D230E)/Pikp-2 (K217R) (0.3)	6	1
Pikp-1/Pikp-2 (D230E)/Pikp-2 (K217R) (0.3)	6	1
Pikp-1/Pikp-2 (D230E)/Pikp-2 (K217R) (0.3)	6	1
Pikp-1/Pikp-2 (D230E)/Pikp-2 (K217R) (0.3)	6	1
Pikp-1/Pikp-2 (D230E)/Pikp-2 (K217R) (0.3)	6	1
Pikp-1/Pikp-2 (D230E)/Pikp-2 (K217R) (0.3)	6	2
Pikp-1/Pikp-2 (D230E)/Pikp-2 (K217R) (0.3)	6	2
Pikp-1/Pikp-2 (D230E)/Pikp-2 (K217R) (0.3)	6	2
Pikp-1/Pikp-2 (D230E)/Pikp-2 (K217R) (0.3)	6	2
Pikp-1/Pikp-2 (D230E)/Pikp-2 (K217R) (0.3)	6	2
Pikp-1/Pikp-2 (D230E)/Pikp-2 (K217R) (0.3)	6	2
Pikp-1/Pikp-2 (D230E)/Pikp-2 (K217R) (0.3)	6	2
Pikp-1/Pikp-2 (D230E)/Pikp-2 (K217R) (0.3)	6	2
Pikp-1/Pikp-2 (D230E)/Pikp-2 (K217R) (0.3)	6	2
Pikp-1/Pikp-2 (D230E)/Pikp-2 (K217R) (0.3)	6	2
Pikp-1/Pikp-2 (D230E)/Pikp-2 (K217R) (0.3)	6	3
Pikp-1/Pikp-2 (D230E)/Pikp-2 (K217R) (0.3)	6	3
Pikp-1/Pikp-2 (D230E)/Pikp-2 (K217R) (0.3)	6	3
Pikp-1/Pikp-2 (D230E)/Pikp-2 (K217R) (0.3)	6	3
Pikp-1/Pikp-2 (D230E)/Pikp-2 (K217R) (0.3)	6	3
Pikp-1/Pikp-2 (D230E)/Pikp-2 (K217R) (0.3)	6	3
Pikp-1/Pikp-2 (D230E)/Pikp-2 (K217R) (0.3)	6	3
Pikp-1/Pikp-2 (D230E)/Pikp-2 (K217R) (0.3)	6	3
Pikp-1/Pikp-2 (D230E)/Pikp-2 (K217R) (0.3)	6	3
Pikp-1/Pikp-2 (D230E)/Pikp-2 (K217R) (0.3)	6	3
Pikp-1/Pikp-2 (D230E)/Pikp-2 (K217R) (0.3)	6	4
Pikp-1/Pikp-2 (D230E)/Pikp-2 (K217R) (0.3)	6	4
Pikp-1/Pikp-2 (D230E)/Pikp-2 (K217R) (0.3)	6	4
Pikp-1/Pikp-2 (D230E)/Pikp-2 (K217R) (0.3)	6	4
Pikp-1/Pikp-2 (D230E)/Pikp-2 (K217R) (0.3)	6	4
Pikp-1/Pikp-2 (D230E)/Pikp-2 (K217R) (0.3)	6	4
Pikp-1/Pikp-2 (D230E)/Pikp-2 (K217R) (0.3)	6	4
Pikp-1/Pikp-2 (D230E)/Pikp-2 (K217R) (0.3)	6	4
Pikp-1/Pikp-2 (D230E)/Pikp-2 (K217R) (0.3)	6	4
Pikp-1/Pikp-2 (D230E)/Pikp-2 (K217R) (0.3)	6	4
Pikp-1/Pikp-2 (D230E)/Pikp-2 (K217R) (0.4)	6	1
Pikp-1/Pikp-2 (D230E)/Pikp-2 (K217R) (0.4)	6	1
Pikp-1/Pikp-2 (D230E)/Pikp-2 (K217R) (0.4)	6	1
Pikp-1/Pikp-2 (D230E)/Pikp-2 (K217R) (0.4)	6	1
Pikp-1/Pikp-2 (D230E)/Pikp-2 (K217R) (0.4)	6	1
Pikp-1/Pikp-2 (D230E)/Pikp-2 (K217R) (0.4)	6	1
Pikp-1/Pikp-2 (D230E)/Pikp-2 (K217R) (0.4)	6	1
Pikp-1/Pikp-2 (D230E)/Pikp-2 (K217R) (0.4)	6	1
Pikp-1/Pikp-2 (D230E)/Pikp-2 (K217R) (0.4)	6	1
Pikp-1/Pikp-2 (D230E)/Pikp-2 (K217R) (0.4)	6	1
Pikp-1/Pikp-2 (D230E)/Pikp-2 (K217R) (0.4)	6	2
Pikp-1/Pikp-2 (D230E)/Pikp-2 (K217R) (0.4)	6	2
Pikp-1/Pikp-2 (D230E)/Pikp-2 (K217R) (0.4)	6	2
Pikp-1/Pikp-2 (D230E)/Pikp-2 (K217R) (0.4)	6	2
Pikp-1/Pikp-2 (D230E)/Pikp-2 (K217R) (0.4)	6	2
Pikp-1/Pikp-2 (D230E)/Pikp-2 (K217R) (0.4)	6	2
Pikp-1/Pikp-2 (D230E)/Pikp-2 (K217R) (0.4)	6	2
Pikp-1/Pikp-2 (D230E)/Pikp-2 (K217R) (0.4)	6	2
Pikp-1/Pikp-2 (D230E)/Pikp-2 (K217R) (0.4)	6	2
Pikp-1/Pikp-2 (D230E)/Pikp-2 (K217R) (0.4)	6	2
Pikp-1/Pikp-2 (D230E)/Pikp-2 (K217R) (0.4)	6	3
Pikp-1/Pikp-2 (D230E)/Pikp-2 (K217R) (0.4)	6	3
Pikp-1/Pikp-2 (D230E)/Pikp-2 (K217R) (0.4)	6	3
Pikp-1/Pikp-2 (D230E)/Pikp-2 (K217R) (0.4)	6	3
Pikp-1/Pikp-2 (D230E)/Pikp-2 (K217R) (0.4)	6	3
Pikp-1/Pikp-2 (D230E)/Pikp-2 (K217R) (0.4)	6	3
Pikp-1/Pikp-2 (D230E)/Pikp-2 (K217R) (0.4)	6	3
Pikp-1/Pikp-2 (D230E)/Pikp-2 (K217R) (0.4)	6	3
Pikp-1/Pikp-2 (D230E)/Pikp-2 (K217R) (0.4)	6	3
Pikp-1/Pikp-2 (D230E)/Pikp-2 (K217R) (0.4)	6	3
Pikp-1/Pikp-2 (D230E)/Pikp-2 (K217R) (0.4)	6	4
Pikp-1/Pikp-2 (D230E)/Pikp-2 (K217R) (0.4)	6	4
Pikp-1/Pikp-2 (D230E)/Pikp-2 (K217R) (0.4)	6	4
Pikp-1/Pikp-2 (D230E)/Pikp-2 (K217R) (0.4)	6	4
Pikp-1/Pikp-2 (D230E)/Pikp-2 (K217R) (0.4)	6	4
Pikp-1/Pikp-2 (D230E)/Pikp-2 (K217R) (0.4)	6	4
Pikp-1/Pikp-2 (D230E)/Pikp-2 (K217R) (0.4)	6	4
Pikp-1/Pikp-2 (D230E)/Pikp-2 (K217R) (0.4)	6	4
Pikp-1/Pikp-2 (D230E)/Pikp-2 (K217R) (0.4)	6	4
Pikp-1/Pikp-2 (D230E)/Pikp-2 (K217R) (0.4)	6	4
Pikp-1/Pikp-2 (D230E)/Pikp-2 (K217R) (0.6)	6	1
Pikp-1/Pikp-2 (D230E)/Pikp-2 (K217R) (0.6)	6	1
Pikp-1/Pikp-2 (D230E)/Pikp-2 (K217R) (0.6)	6	1
Pikp-1/Pikp-2 (D230E)/Pikp-2 (K217R) (0.6)	6	1
Pikp-1/Pikp-2 (D230E)/Pikp-2 (K217R) (0.6)	6	1
Pikp-1/Pikp-2 (D230E)/Pikp-2 (K217R) (0.6)	6	1
Pikp-1/Pikp-2 (D230E)/Pikp-2 (K217R) (0.6)	6	1
Pikp-1/Pikp-2 (D230E)/Pikp-2 (K217R) (0.6)	6	1
Pikp-1/Pikp-2 (D230E)/Pikp-2 (K217R) (0.6)	6	1
Pikp-1/Pikp-2 (D230E)/Pikp-2 (K217R) (0.6)	6	1
Pikp-1/Pikp-2 (D230E)/Pikp-2 (K217R) (0.6)	6	2
Pikp-1/Pikp-2 (D230E)/Pikp-2 (K217R) (0.6)	6	2
Pikp-1/Pikp-2 (D230E)/Pikp-2 (K217R) (0.6)	6	2
Pikp-1/Pikp-2 (D230E)/Pikp-2 (K217R) (0.6)	6	2
Pikp-1/Pikp-2 (D230E)/Pikp-2 (K217R) (0.6)	6	2
Pikp-1/Pikp-2 (D230E)/Pikp-2 (K217R) (0.6)	6	2
Pikp-1/Pikp-2 (D230E)/Pikp-2 (K217R) (0.6)	6	2
Pikp-1/Pikp-2 (D230E)/Pikp-2 (K217R) (0.6)	6	2
Pikp-1/Pikp-2 (D230E)/Pikp-2 (K217R) (0.6)	6	2
Pikp-1/Pikp-2 (D230E)/Pikp-2 (K217R) (0.6)	6	2
Pikp-1/Pikp-2 (D230E)/Pikp-2 (K217R) (0.6)	6	3
Pikp-1/Pikp-2 (D230E)/Pikp-2 (K217R) (0.6)	6	3
Pikp-1/Pikp-2 (D230E)/Pikp-2 (K217R) (0.6)	6	3
Pikp-1/Pikp-2 (D230E)/Pikp-2 (K217R) (0.6)	6	3
Pikp-1/Pikp-2 (D230E)/Pikp-2 (K217R) (0.6)	6	3
Pikp-1/Pikp-2 (D230E)/Pikp-2 (K217R) (0.6)	6	3
Pikp-1/Pikp-2 (D230E)/Pikp-2 (K217R) (0.6)	6	3
Pikp-1/Pikp-2 (D230E)/Pikp-2 (K217R) (0.6)	6	3
Pikp-1/Pikp-2 (D230E)/Pikp-2 (K217R) (0.6)	6	3
Pikp-1/Pikp-2 (D230E)/Pikp-2 (K217R) (0.6)	6	3
Pikp-1/Pikp-2 (D230E)/Pikp-2 (K217R) (0.6)	6	4
Pikp-1/Pikp-2 (D230E)/Pikp-2 (K217R) (0.6)	6	4
Pikp-1/Pikp-2 (D230E)/Pikp-2 (K217R) (0.6)	6	4
Pikp-1/Pikp-2 (D230E)/Pikp-2 (K217R) (0.6)	6	4
Pikp-1/Pikp-2 (D230E)/Pikp-2 (K217R) (0.6)	6	4
Pikp-1/Pikp-2 (D230E)/Pikp-2 (K217R) (0.6)	6	4
Pikp-1/Pikp-2 (D230E)/Pikp-2 (K217R) (0.6)	6	4
Pikp-1/Pikp-2 (D230E)/Pikp-2 (K217R) (0.6)	6	4
Pikp-1/Pikp-2 (D230E)/Pikp-2 (K217R) (0.6)	6	4
Pikp-1/Pikp-2 (D230E)/Pikp-2 (K217R) (0.6)	6	4
